# Supplementary material for: A catalytic hydroesterification process using HCO2Na, Ru3(CO)12 and alcohols for the preparation of ester modified polybutadienes
Source: Royal Society of Chemistry journal article supplement (doi:10.1039/c5cc05815e), 2015-01-01
Supplement: c5cc05815e1.pdf [file c5cc05815e1.pdf]

*Electronic Supplementary Information*

**A Catalytic Hydroesterification Process Using  $\text{HCO}_2\text{Na}$ ,  
 $\text{Ru}_3(\text{CO})_{12}$  and Alcohols for Preparing Ester Modified  
Polybutadienes**

Woo-Jin Park,<sup>§</sup> Chang-Hee Lee,<sup>§</sup> Dong-Su Kim and Chul-Ho Jun\*

*Department of Chemistry, Yonsei University, 50 Yonsei-ro, Seodaemun-gu, Seoul 120-749, Korea  
(Republic of)*

[<sup>§</sup> These authors are contributed to this work equally.]

**Contents**

|                                                                                                                 |            |
|-----------------------------------------------------------------------------------------------------------------|------------|
| <b>1. General.....</b>                                                                                          | <b>S2</b>  |
| <b>2. Materials.....</b>                                                                                        | <b>S2</b>  |
| <b>3. Experimental.....</b>                                                                                     | <b>S2</b>  |
| - A typical procedure for synthesis of modified polybutadiene (Table 1, entry 1)                                |            |
| - A typical procedure for synthesis of modified polybutadiene with 1:1 ratio of mixed esters (Table 3, entry 1) |            |
| - Measurements of fluorescence spectra of 7l in the presence of various metal(II) cations                       |            |
| - Calculation of isolated yield of ester-containing modified polybutadiene                                      |            |
| <b>4. <math>^1\text{H}</math> and <math>^{13}\text{C}</math> NMR spectra.....</b>                               | <b>S11</b> |
| <b>5. IR spectra.....</b>                                                                                       | <b>S28</b> |
| <b>6. TGA and DSC thermograms.....</b>                                                                          | <b>S36</b> |

## 1. General

$^1\text{H}$  NMR and  $^{13}\text{C}$  NMR were recorded on a Bruker Advance II/DPX 400(400 MHz  $^1\text{H}$ , 100 MHz  $^{13}\text{C}$ ) spectrometers and chemical shifts are reported relative to residual deuterated solvent peaks.  $^1\text{H}$  NMR spectra were referenced to  $\text{CD}_2\text{Cl}_2$  (for  $^1\text{H}$ ,  $\delta = 5.32$  ppm) as an internal standard and are reported as chemical shift multiplicity: br = broad, s = singlet, d = doublet, t = triplet, q = quartet, m = multiplet.  $^{13}\text{C}$  NMR spectra were referenced to the residual  $\text{CDCl}_3$  (for  $^{13}\text{C}$ ,  $\delta = 77.26$  ppm) as internal standard. Infrared spectra were obtained on a Bruker Vertex70 spectrometer. Fluorescence spectra were obtained on a Perkin Elmer LS 55. Thermo Gravimetric Analysis (TGA) was carried out using a Perkin Elmer STA8000, with heating from 30 to 600 °C at a heating rate of 20 °C/min. Differential Scanning Calorimetry (DSC) was carried out using a Perkin Elmer DSC 8000, with heating from -80 to 100 °C, in  $\text{N}_2$  atmosphere, at a flow rate of 20 mL/min. Analytical GPC was performed on a JASCO HPLC equipped with HF-404HQ columns (ID. 4.6 X L. 250 mm, Shodex, Tokyo, Japan) using THF as the eluent at a flow rate of 1.0 ml/min.

## 2. Materials

Polybutadiene (**1**) which contains 45% vinyl, 5% *cis*-1,4 internal olefin, 10% *trans*-1,4 internal olefin and 40% saturated part was purchased from Aldrich and its average molecular weight is 1800. Most reagent grade chemicals [1,4-dioxane, acetonitrile, dichloromethane, **1**, **2a-c**, **3a**, **3b**, **3d-g**, **3i-k**, **4a**, **5a**, pyrene, ferrocene carboxaldehyde, cyclobutanecarboxylic acid, copper(II) perchlorate hexahydrate, zinc(II) perchlorate hexahydrate, calcium(II) perchlorate tetrahydrate, cadmium(II) perchlorate hydrate, magnesium(II) perchlorate, nickel(II) perchlorate hexahydrate and cobalt(II) perchlorate hexahydrate] were purchased from Aldrich, Acros Organics and TCI Chemical Company and used as received unless otherwise stated. Cyclobutylmethanol (**3c**) was prepared by reduction of cyclobutanecarboxylic acid using lithium aluminum hydride. Ferrocenylmethanol (**3h**) was prepared by reduction of ferrocene carboxaldehyde using lithium aluminum hydride. Pyrenylmethyl alcohol (**3l**) was prepared by Rieche formylation of pyrene followed by reduction of the resulting aldehyde using lithium aluminum hydride.

## 3. Experimental

- A typical procedure for synthesis of modified polybutadiene (Table 1, entry 1)

A 5 mL pressure vial was charged with polybutadiene (**1**, 50 mg, (0.416 mmol of vinyl group)), sodium formate (**2a**, 56.6 mg, (0.832 mmol)), 2-phenylethyl alcohol (**3a**, 61.0 mg, (0.499 mmol)), Ru<sub>3</sub>(CO)<sub>12</sub> (**4a**, 13.4 mg, (0.02095 mmol)), 2-pyridinemethanol (**5a**, 9.1 mg, (0.0832 mmol)) and 1,4-dioxane (1 mL). The mixture was stirred at 150 °C for 6 h. After cooling to room temperature, the mixture was concentrated in vacuo, and the residue was washed thoroughly with methanol and dried to give the 2-phenylethyl ester containing modified polybutadiene (**6a**).

**- A typical procedure for synthesis of modified polybutadiene with 1:1 ratio of mixed esters (Table 3, entry 1)**

A 5 mL pressure vial was charged with polybutadiene (**1**, 50 mg, (0.416 mmol of vinyl group)), sodium formate (**2a**, 56.6 mg (0.832 mmol)), 2-phenylethyl alcohol (**3a**, 50.8 mg (0.416 mmol)), heptanol (**3b**, 48.3 mg (0.416 mmol)), Ru<sub>3</sub>(CO)<sub>12</sub> (**4a**, 13.4 mg, (0.02095 mmol)), 2-pyridinemethanol (**5a**, 9.1 mg, (0.0832 mmol)) and 1,4-dioxane (1 mL). The mixture was stirred at 150 °C for 6 h. After cooling to room temperature, the mixture was concentrated in vacuo, and the residue was washed thoroughly with methanol and dried to give the 1:1 ratio of 2-phenylethyl and heptyl ester containing modified polybutadiene (**7a**).

**- Measurements of fluorescence spectra of 7I in the presence of various metal(II) cations**

The fluorescence spectra were recorded following addition of various concentrations (0-40 x 10<sup>-6</sup> M) of copper(II) perchlorate hexahydrate in acetonitrile (1 mL) into polybutadiene modified with pyrenylmethyl ester (**7I**) in 1 mL of dichloromethane (Figure 2a). Solutions of **7I** (5 x 10<sup>-6</sup> M, based on pyrenylmethyl ester group in modified polybutadiene) in 1 mL of dichloromethane were independently treated with 40 x 10<sup>-6</sup> M of metal(II) perchlorates (Zn<sup>2+</sup>, Ca<sup>2+</sup>, Cd<sup>2+</sup>, Mg<sup>2+</sup>, Ni<sup>2+</sup>, Co<sup>2+</sup> and Cu<sup>2+</sup>) in 1 mL of acetonitrile. Fluorescence spectra of the mixtures were then recorded.

**Polybutadiene (1):** 45% of vinyl and 55% of internal olefins and saturated hydrocarbons based on terminal phenyl; <sup>1</sup>H NMR (400 MHz, CD<sub>2</sub>Cl<sub>2</sub>) δ 7.26-7.24 (br m), 7.18 (br m), 5.86-5.77 (br m), 5.60-5.58 (br m), 5.39-5.31 (br m), 4.97 (br m), 2.66-2.64 (br m), 2.53 (br m), 2.38 (br s), 2.04 (br m), 1.54 (br m),

1.45 (br m), 1.43 (br m), 1.29 (br m), 0.91 (br m), 0.68 (br m), 0.66 (br m); <sup>13</sup>C NMR (100 MHz, CDCl<sub>3</sub>) δ 144.7, 144.4, 143.8, 143.4, 143.2, 142.9, 131.9, 130.8, 130.3, 130.2, 129.8, 129.6, 129.5, 128.7, 128.6, 128.5, 128.4, 128.1, 127.9, 125.9, 125.8, 114.5, 114.4, 114.1, 113.1, 112.2, 111.9, 45.5, 44.0, 43.8, 12.6, 41.8, 41.3, 41.0, 40.5, 39.8, 39.5, 39.3, 39.1, 38.9, 38.4, 37.7, 36.2, 36.1, 35.8, 34.5, 34.4, 34.2, 33.7, 33.0, 32.5, 32.2, 31.6, 30.6, 30.4, 27.8, 27.6, 25.8, 25.2; IR spectrum (CDCl<sub>3</sub>) 3076, 2999, 2974, 2918, 2854,

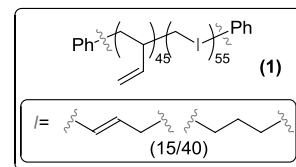

1825, 1639, 1605, 1496, 1453, 1417, 1379, 1348, 1294, 1265, 1077, 995, 968, 909, 741, 698, 679  $\text{cm}^{-1}$ ;  $T_d = 454\text{ }^\circ\text{C}$ ;  $T_g = -30.2\text{ }^\circ\text{C}$ ;  $M_n = 2702$ ,  $M_w = 5843$ ,  $\text{PDI} = 2.16$ .

**2-Phenylethyl ester-containing modified polybutadiene (6a):** 28% of 2-phenylethyl ester and the rest (72%) of internal olefins and saturated hydrocarbons based on terminal phenyl group (72% yield, 73.9 mg);  $^1\text{H}$  NMR (400 MHz,  $\text{CD}_2\text{Cl}_2$ )  $\delta$  7.28-7.24 (br m), 5.18-5.10 (br m, internal  $-\text{CH}=\text{CH}-$ ), 4.26 (br s), 2.93 (br s), 2.58 (br s), 2.26 (br s), 1.99 (br s), 1.68 (br s), 1.58 (br s), 1.28 (br m), 0.98 (br s), 0.85 (br s);  $^{13}\text{C}$  NMR (100 MHz,  $\text{CDCl}_3$ )  $\delta$  174.2 (CO), 138.0, 130.5, 129.8, 129.0, 128.6, 127.7, 126.7, 64.9, 37.1, 36.7, 35.3, 33.1, 32.8, 32.4, 32.0, 29.89, 28.4, 27.8, 27.4, 13.7, 13.4, 12.9, 11.9; IR spectrum ( $\text{CDCl}_3$ ) 2926, 2855, 2097, 1977, 1945, 1735, 1670, 1497, 1455, 1378, 1260, 1164, 747, 699  $\text{cm}^{-1}$ ;  $T_d = 306\text{ }^\circ\text{C}$ ,  $415\text{ }^\circ\text{C}$ ;  $T_g = -11.2\text{ }^\circ\text{C}$ ;  $M_n = 4716$ ,  $M_w = 10868$ ,  $\text{PDI} = 2.30$ .

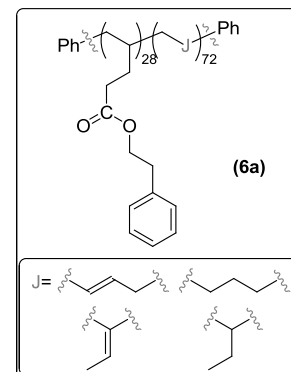

**Heptyl ester-containing modified polybutadiene (6d):** 23% of heptyl ester and the rest (77%) of internal olefins and saturated hydrocarbons based on terminal phenyl group (88% yield, 90.1 mg);  $^1\text{H}$  NMR (400 MHz,  $\text{CD}_2\text{Cl}_2$ )  $\delta$  7.25 (br s), 7.16 (br s), 5.38-5.09 (br m, internal  $-\text{CH}=\text{CH}-$ ), 4.02 (br s), 2.57 (br s), 2.27 (br s), 1.98 (br s), 1.58 (br s), 1.28 (br m), 0.96 (br s), 0.89 (br s);  $^{13}\text{C}$  NMR (100 MHz,  $\text{CDCl}_3$ )  $\delta$  174.4 (CO), 128.5, 64.6, 32.8, 32.6, 31.9, 29.9, 29.1, 28.8, 28.4, 26.1, 22.8, 14.3, 13.5, 13.1, 12.9; IR spectrum ( $\text{CDCl}_3$ ) 2959, 2926, 2856, 2047, 1978, 1947, 1737, 1456, 1378, 1254, 1167, 1066, 968, 874, 758, 699  $\text{cm}^{-1}$ ;  $T_d = 254\text{ }^\circ\text{C}$ ,  $396\text{ }^\circ\text{C}$ ;  $T_g = -23.4\text{ }^\circ\text{C}$ ;  $M_n = 4778$ ,  $M_w = 11869$ ,  $\text{PDI} = 2.48$ .

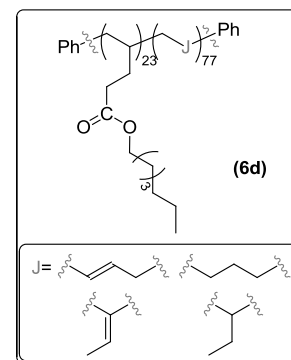

**Methylcyclobutyl ester-containing modified polybutadiene (6e):** 21% of methylcyclobutyl ester and the rest (79%) of internal olefins and saturated hydrocarbons based on terminal phenyl group (84% yield, 82.0 mg);  $^1\text{H}$  NMR (400 MHz,  $\text{CD}_2\text{Cl}_2$ )  $\delta$  7.25 (br s), 7.17 (br s), 5.32-5.10 (br m, internal  $-\text{CH}=\text{CH}-$ ), 4.01 (br s), 2.60 (br s), 2.29 (br s), 1.99 (br m), 1.77 (br m), 1.57 (br s), 1.27 (br m), 0.96 (br s), 0.85 (br s);  $^{13}\text{C}$  NMR (100 MHz,  $\text{CDCl}_3$ )  $\delta$  174.4 (CO), 13.05, 128.4, 125.7, 68.3, 38.9, 37.2, 35.4, 34.3, 33.2, 32.8, 32.1, 31.7, 30.4, 29.9, 28.4, 27.8, 26.9, 26.0, 24.9, 23.2, 18.6, 14.3; IR spectrum ( $\text{CDCl}_3$ ) 2926, 2856, 2061, 2028, 1990, 1946, 1737, 1670, 1457, 1378, 1290, 1251, 1217, 1168, 1100, 969, 910, 807, 758, 699, 667  $\text{cm}^{-1}$ ;  $T_d = 257\text{ }^\circ\text{C}$ ,  $406\text{ }^\circ\text{C}$ ;  $T_g = -16.5\text{ }^\circ\text{C}$ ;  $M_n = 4062$ ,  $M_w = 8184$ ,  $\text{PDI} = 2.01$ .

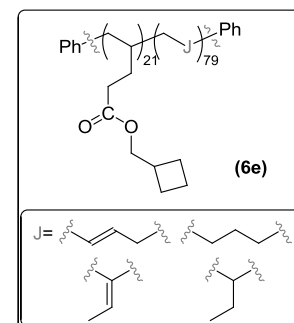

**Benzyl ester-containing modified polybutadiene (6f):** 26% of benzyl ester and the rest (74%) of internal olefins and saturated hydrocarbons based on terminal phenyl group (86% yield, 84.9 mg);  $^1\text{H}$  NMR (400 MHz,  $\text{CD}_2\text{Cl}_2$ )  $\delta$  7.36 (br s), 7.19 (br m), 5.41-5.11 (br m, internal  $-\text{CH}=\text{CH}-$ ), 2.60 (br s), 2.36 (br s), 2.01 (br s), 1.59 (br s), 1.30 (br s), 0.99 (br m) 0.87 (br s);  $^{13}\text{C}$  NMR (100 MHz,  $\text{CDCl}_3$ )  $\delta$  173.8 (CO), 136.2, 128.6, 128.3, 66.2, 38.2, 37.1, 36.7, 35.9, 33.2, 32.8, 32.4, 30.3, 29.8, 28.7, 28.3, 27.7, 27.4, 13.4, 13.1, 12.9; IR spectrum ( $\text{CDCl}_3$ ) 3032, 2959, 2925, 2855, 2047, 1976, 1738, 1493, 1453, 1379, 1258, 1156, 968, 882, 750, 697  $\text{cm}^{-1}$ ;  $T_d = 308$   $^\circ\text{C}$ , 405  $^\circ\text{C}$ ;  $T_g = -13.1$   $^\circ\text{C}$ ;  $M_n = 4447$ ,  $M_w = 10372$ , PDI = 2.33.

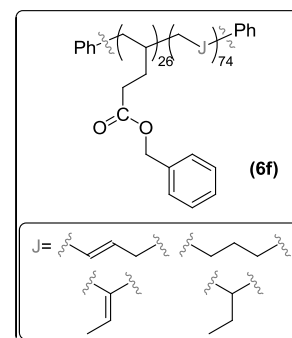

**2-Pyridylmethyl ester-containing modified polybutadiene (6g):** 23% of 2-pyridylmethyl ester and the rest (77%) of internal olefins and saturated hydrocarbons based on terminal phenyl group (80% yield, 80.1 mg);  $^1\text{H}$  NMR (400 MHz,  $\text{CD}_2\text{Cl}_2$ )  $\delta$  8.55 (br s), 7.70 (br s), 7.34 (br s), 7.22 (br s), 5.32-5.19 (br m, internal  $-\text{CH}=\text{CH}-$ ), 2.60 (br m), 2.42 (br m), 1.99 (br m), 1.58 (br s), 1.28 (br m), 0.97 (br s), 0.86 (br s);  $^{13}\text{C}$  NMR (100 MHz,  $\text{CDCl}_3$ )  $\delta$  173.6 (CO), 156.1, 149.5, 141.0, 136.7, 130.4, 128.4, 125.9, 125.6, 123.6, 122.8, 121.8, 66.7, 38.8, 38.3, 37.1, 36.7, 36.1, 32.3, 32.7, 32.3, 31.9, 30.2, 29.8, 29.6, 28.6, 28.3, 27.8, 26.8, 25.9, 13.6; IR spectrum ( $\text{CDCl}_3$ ) 2925, 2855, 2046, 2026, 1974, 1943, 1740, 1666, 1633, 1594, 1573, 1454, 1378, 1265, 1240 1156, 1048, 969, 881, 755, 700  $\text{cm}^{-1}$ ;  $T_d = 296$   $^\circ\text{C}$ , 415  $^\circ\text{C}$ ;  $T_g = -10.0$   $^\circ\text{C}$ ;  $M_n = 5059$ ,  $M_w = 11142$ , PDI = 2.20.

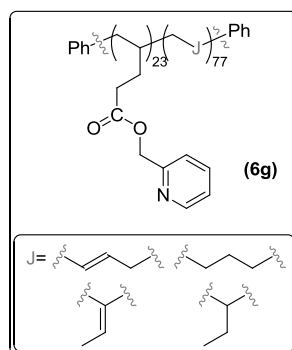

**2-Thiopheneethyl ester-containing modified polybutadiene (6h):** 16% of 2-thiopheneethyl ester, 8% of vinyl and the rest (76%) of internal olefins and saturated hydrocarbons based on terminal phenyl group (73% yield, 78.6 mg);  $^1\text{H}$  NMR (400 MHz,  $\text{CD}_2\text{Cl}_2$ )  $\delta$  7.25 (br s), 7.16 (br s), 6.94 (br s), 6.87 (br s), 5.39-5.20 (br m, internal  $-\text{CH}=\text{CH}-$ ), 4.95 (br m, vinyl  $-\text{CH}=\text{CH}_2$ ), 4.26 (br s), 3.14 (br s), 2.70 (br m), 2.63 (br s), 2.30 (br m), 1.98 (br s), 1.56 (br s), 1.27 (br m), 0.95 (br s), 0.85 (br s);  $^{13}\text{C}$  NMR (100 MHz,  $\text{CDCl}_3$ )  $\delta$  173.8 (CO), 140.0, 128.4, 126.9, 125.5, 124.0, 64.5, 44.6, 41.0, 38.9, 37.1, 36.7, 32.7, 32.3, 31.9, 30.7, 29.8, 29.4, 28.6, 28.3, 27.8, 26.8, 25.9, 23.1, 14.3; IR spectrum ( $\text{CDCl}_3$ ) 2925, 2855, 2073, 2047, 1997, 1975, 1921, 1738, 1454, 1379, 1244, 1217, 1164, 1079, 1039, 969, 851, 823, 759, 695, 560, 504  $\text{cm}^{-1}$ ;  $T_d = 391$   $^\circ\text{C}$ ;  $T_g = 18.0$   $^\circ\text{C}$ ;  $M_n = 4254$ ,  $M_w = 8926$ , PDI = 2.10.

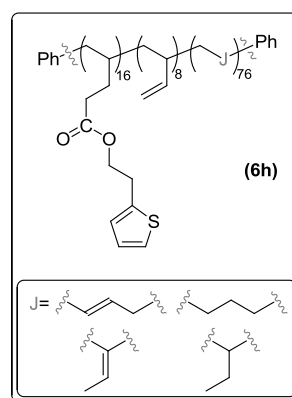

**4-Pyridylpropyl ester-containing modified polybutadiene (6i):** 12% of 4-pyridylpropyl ester, 12% of vinyl and the rest (76%) of internal olefins and saturated hydrocarbons based on terminal phenyl group (71% yield, 80.4 mg);  $^1\text{H}$  NMR (400 MHz,  $\text{CD}_2\text{Cl}_2$ )  $\delta$  8.45 (br s), 7.23 (br s), 7.17 (br s), 7.12 (br s), 5.39-5.18 (br m, internal  $-\text{CH}=\text{CH}-$ ), 4.95 (br m, vinyl  $-\text{CH}=\text{CH}_2$ ) 4.06 (br s), 2.68 (br s), 2.30 (br s), 1.97 (br s), 1.78 (br m), 1.56 (br s), 0.85 (br s);  $^{13}\text{C}$  NMR (100 MHz,  $\text{CDCl}_3$ )  $\delta$  174.2 (CO), 150.3, 140.9, 130.5, 129.9, 128.5, 124.0, 63.4, 32.8, 31.7, 29.8, 29.3, 28.3, 27.8, 27.4, 26.8, 13.4, 12.8, 12.0, 11.7; IR spectrum ( $\text{CDCl}_3$ ) 2921, 2855, 2041, 2022, 1999, 1971, 1938, 1732, 1604, 1573, 1462, 1378, 1218, 1167, 1069, 1028, 995, 969, 880, 838, 798, 769, 700, 666  $\text{cm}^{-1}$ ;  $T_d = 318$   $^\circ\text{C}$ , 415  $^\circ\text{C}$ ; The polymer showed no obvious glass transition between  $-80$  and  $100$   $^\circ\text{C}$ ;  $M_n = 4071$ ,  $M_w = 7526$ , PDI = 1.85.

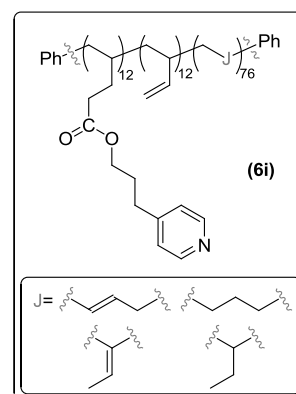

**4-(2-Hydroxyethyl)phenethyl ester-containing modified polybutadiene (6j):** 27% of 4-(2-hydroxyethyl)phenethyl ester and the rest (73%) of internal olefins and saturated hydrocarbons based on terminal phenyl group (70% yield, 77.9 mg);  $^1\text{H}$  NMR (400 MHz,  $\text{CD}_2\text{Cl}_2$ )  $\delta$  7.16 (br m), 5.32-5.10 (br m, internal  $-\text{CH}=\text{CH}-$ ), 4.23 (br s), 3.79 (br s), 2.89-2.81 (br m), 2.59 (br s), 2.27 (br s), 1.99 (br s), 1.57 (br s), 1.27 (br s), 0.97 (br s), 0.85 (br m);  $^{13}\text{C}$  NMR (100 MHz,  $\text{CDCl}_3$ )  $\delta$  174.1 (CO), 136.9, 135.9, 129.2, 129.1, 128.4, 64.9, 63.6, 38.9, 34.8, 32.7, 32.4, 32.0, 29.8, 28.6, 28.3, 13.4, 13.1, 12.8, 12.0, 11.6; IR spectrum ( $\text{CDCl}_3$ ) 2925, 2855, 2047, 2020, 1997, 1973, 1934, 1736, 1604, 1515, 1456, 1377, 1264, 1162, 1114, 1048, 1022, 968, 811, 761, 738, 699  $\text{cm}^{-1}$ ;  $T_d = 304$   $^\circ\text{C}$ , 412  $^\circ\text{C}$ ;  $T_g = 4.3$   $^\circ\text{C}$ ;  $M_n = 4881$ ,  $M_w = 12821$ , PDI = 2.63.

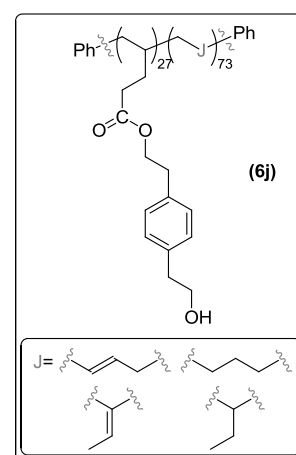

**Ferrocenylmethyl ester-containing modified polybutadiene (6k):** 19% of ferrocenylmethyl ester and the rest (81%) of internal olefins and saturated hydrocarbons based on terminal phenyl group (83% yield, 97.2 mg);  $^1\text{H}$  NMR (400 MHz,  $\text{CD}_2\text{Cl}_2$ )  $\delta$  7.29 (br m) 7.21 (br m), 5.32-5.13 (br m, internal  $-\text{CH}=\text{CH}-$ ), 4.92 (br s), 4.29 (br s), 4.19 (br m), 2.65 (br s), 2.31 (br s), 2.00 (br s), 1.60 (br s), 1.29 (br m), 0.99 (br s), 0.87 (br s);  $^{13}\text{C}$  NMR (100 MHz,  $\text{CDCl}_3$ )  $\delta$  173.9 (CO), 139.9, 138.8, 131.7, 130.4, 128.4, 81.4, 69.6, 68.8, 68.6, 62.7, 39.0, 37.0, 32.7, 29.7, 28.2, 13.3, 12.8, 12.0; IR spectrum ( $\text{CDCl}_3$ ) 2960, 2925, 2855, 2047, 2024, 1973, 1941, 1737, 1603, 1567, 1455, 1377, 1288, 1217, 1155, 1107, 1041, 1001, 968, 874, 818, 758, 698, 637  $\text{cm}^{-1}$ ;  $T_d = 223$   $^\circ\text{C}$ , 409  $^\circ\text{C}$ ; The polymer showed no obvious glass transition between  $-80$  and  $100$   $^\circ\text{C}$ ;  $M_n = 4453$ ,  $M_w = 9396$ , PDI = 2.11.

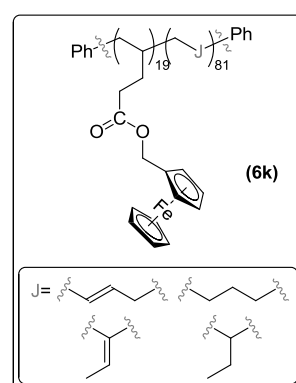

**4-Amino-2-phenylethyl ester-containing modified polybutadiene (6l):** 11% of 4-amino-2-phenylethyl ester and the rest (89%) of internal olefins and saturated hydrocarbons based on terminal phenyl group (64% yield, 74.6 mg);  $^1\text{H}$  NMR (400 MHz,  $\text{CD}_2\text{Cl}_2$ )  $\delta$  7.26 (br s), 7.17 (br s), 6.98 (br s), 6.60 (br s), 5.39-5.10 (br m, internal  $-\text{CH}=\text{CH}-$ ), 4.17 (br s), 3.64 (br s), 2.79 (br s), 2.60 (br m), 2.27 (br m), 1.98 (br m), 1.74 (br s), 1.67 (br s), 1.57 (br s), 1.27 (br s), 0.97-0.84 (br m);  $^{13}\text{C}$  NMR (100 MHz,  $\text{CDCl}_3$ )  $\delta$  174.2 (CO), 145.1, 129.9, 128.5, 127.7, 120.3, 115.4, 65.3, 38.8, 37.2, 34.4, 32.8, 32.1, 29.8, 28.4, 13.5, 12.9, 12.0; IR spectrum ( $\text{CDCl}_3$ ) 3464, 3375, 3286, 2925, 2856, 2023, 2002, 1974, 1937, 1733, 1625, 1518, 1455, 1379, 1265, 1165, 1049, 968, 909, 822, 767, 700  $\text{cm}^{-1}$ ;  $T_d = 308$  °C, 418 °C;  $T_g = 18.0$  °C;  $M_n = 4056$ ,  $M_w = 8470$ , PDI = 2.09.

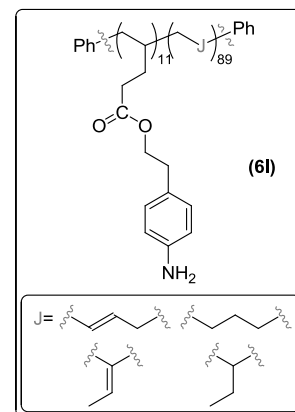

**2-Phenylethyl ester and heptyl ester-containing modified polybutadiene (7a):** 11% of 2-phenylethyl ester, 11% of heptyl ester and the rest (78%) of internal olefins and saturated hydrocarbons based on terminal phenyl group (83% yield, 82.9 mg);  $^1\text{H}$  NMR (400 MHz,  $\text{CD}_2\text{Cl}_2$ )  $\delta$  7.27 – 7.23 (br m), 5.32-5.09 (br m, internal  $-\text{CH}=\text{CH}-$ ), 4.25 (br s), 4.02 (br s), 2.92 (br s), 2.57 (br s), 2.26 (br s), 1.98 (br s), 1.58 (br s), 1.27 (br s), 0.97 (br s), 0.89-0.84 (br m);  $^{13}\text{C}$  NMR (100 MHz,  $\text{CDCl}_3$ )  $\delta$  174.1 (CO), 137.9, 129.0, 128.6, 126.6, 64.8, 64.5, 38.7, 36.7, 35.3, 33.3, 32.8, 31.9, 30.7, 30.3, 29.9, 29.1, 28.8, 28.3, 27.8, 26.9, 26.0, 22.7, 14.2; IR spectrum ( $\text{CDCl}_3$ ) 3027, 2959, 2926, 2855, 2073, 2047, 1997, 1977, 1922, 1737, 1662, 1605, 1455, 1378, 1250, 1166, 1049, 1032, 969, 881, 758, 699, 667, 644, 560  $\text{cm}^{-1}$ ;  $M_n = 4736$ ,  $M_w = 10811$ , PDI = 2.28.

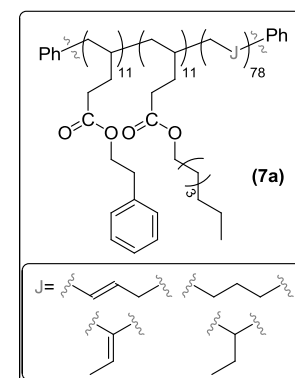

**2-Phenylethyl ester and 2-thiopheneethyl ester containing modified polybutadiene (7b):** 13% of 2-phenylethyl ester, 13% of 2-thiopheneethyl ester and the rest (74%) of internal olefins and saturated hydrocarbons based on terminal phenyl group (54% yield, 55.2 mg);  $^1\text{H}$  NMR (400 MHz,  $\text{CD}_2\text{Cl}_2$ )  $\delta$  7.27-7.16 (br m), 6.93 (br s), 6.86 (br s), 5.38-5.10 (br m, internal  $-\text{CH}=\text{CH}-$ ), 4.25 (br s), 3.13 (br s), 2.91 (br s), 2.59 (br s), 2.29 (br s), 1.97 (br s), 1.56 (br s), 1.27 (br s), 0.97 (br m), 0.83 (br s);  $^{13}\text{C}$  NMR (100 MHz,  $\text{CDCl}_3$ )  $\delta$  174.0 (CO), 140.1, 137.9, 129.0, 128.6, 128.5, 126.9, 126.6, 125.6, 124.1, 64.9, 64.6, 35.3, 33.3, 32.8, 32.4, 32.0, 30.3, 29.9, 29.5, 28.3, 27.8, 26.9, 25.9, 13.5, 13.1, 12.9; IR spectrum ( $\text{CDCl}_3$ ) 3027, 2958, 2925, 2855, 2046, 2027, 1995, 1977, 1941, 1737, 1666, 1605, 1564, 1455, 1379, 1246, 1217, 1162, 969, 851, 824, 758, 698  $\text{cm}^{-1}$ ;  $M_n = 4642$ ,  $M_w = 9841$ , PDI = 2.12.

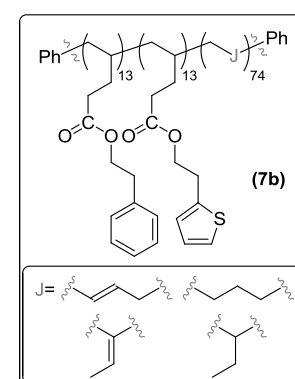

**2-Phenylethyl ester and 4-(2-hydroxyethyl)phenethyl ester-containing modified polybutadiene (7c):**

12% of 2-phenylethyl ester, 12% of 4-(2-hydroxyethyl)phenethyl ester and the rest (76%) of internal olefins and saturated hydrocarbons based on terminal phenyl group (88% yield, 95.0 mg);  $^1\text{H}$  NMR (400 MHz,  $\text{CD}_2\text{Cl}_2$ )  $\delta$  7.30-7.17 (br m), 5.39-5.10 (br m, internal  $-\text{CH}=\text{CH}-$ ), 4.24 (br s), 3.80 (br s), 2.90 (br s), 2.83-2.80 (br m), 2.27 (br m), 1.98 (br s), 1.68 (br s), 1.58 (br s), 1.27 (br s), 0.98 (br m), 0.85-0.84 (br m);  $^{13}\text{C}$  NMR (100 MHz,  $\text{CDCl}_3$ )  $\delta$  174.1 (CO), 141.1, 138.0, 136.9, 136.0, 129.3, 129.2, 129.0, 128.6, 126.7, 64.9, 63.7, 38.9, 37.1, 36.7, 35.3, 34.9, 33.3, 32.8, 32.5, 32.1, 30.3, 29.9, 28.4, 27.8, 26.9, 26.0, 13.5, 13.2; IR spectrum ( $\text{CDCl}_3$ ) 3418, 2927, 2856, 2049, 1980, 1940, 1734, 1666, 1565, 1515, 1498, 1454, 1383, 1251, 1170, 1032, 969, 757, 699, 645  $\text{cm}^{-1}$ ;  $M_n = 3943$ ,  $M_w = 9017$ , PDI = 2.29.

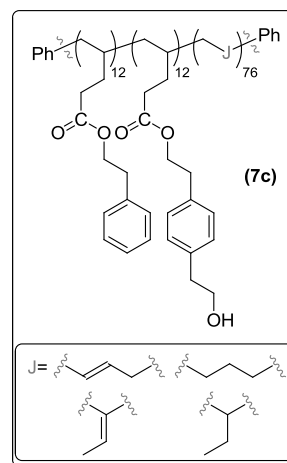

**2-Phenylethyl ester and pyrenyl methyl ester-containing modified polybutadiene (7h):**

11% of 2-phenylethyl ester, 11% of pyrenyl methyl ester and the rest (78%) of internal olefins and saturated hydrocarbons based on terminal phenyl group (84% yield, 91.3 mg);  $^1\text{H}$  NMR (400 MHz,  $\text{CDCl}_3$ )  $\delta$  8.27 (br s), 8.18-8.16 (br m), 8.07 (br m), 7.22 (br s), 5.83 (br s), 5.43-5.08 (br m, internal  $-\text{CH}=\text{CH}-$ ), 4.27 (br s), 2.93 (br s), 2.58 (br s), 2.31 (br m), 1.96 (br s), 1.68 (br s), 1.57 (br s), 1.25 (br s), 0.97 (br m), 0.83 (br m);  $^{13}\text{C}$  NMR (100 MHz,  $\text{CDCl}_3$ )  $\delta$  174.1 (CO), 138.0, 131.8, 131.3, 130.8, 130.5, 129.6, 129.0, 128.6, 128.4, 128.2, 127.9, 127.5, 126.7, 126.2, 125.6, 125.5, 124.9, 124.7, 123.0, 64.9, 64.7, 36.7, 35.3, 32.8, 32.5, 32.1, 29.9, 28.3, 27.8, 23.1, 13.5, 13.1, 12.9, 12.0, 11.7; IR spectrum ( $\text{CDCl}_3$ ) 2927, 2856, 2063, 1991, 1732, 1669, 1605, 1497, 1456, 1378, 1250, 1171, 1031, 969, 847, 768, 700, 667, 643, 623, 579, 520  $\text{cm}^{-1}$ ;  $M_n = 4041$ ,  $M_w = 8372$ , PDI = 2.07.

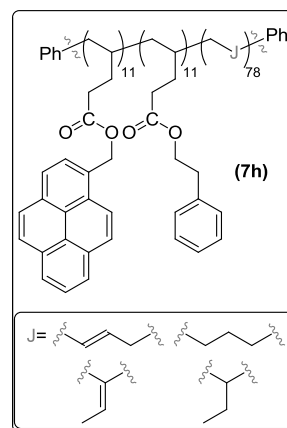

**2-Phenylethyl ester, heptyl ester and pyrenyl methyl ester-containing modified polybutadiene (8a):**

9% of 2-phenylethyl ester, 9% of heptyl ester, 9% of pyrenyl methyl ester and the rest (73%) of internal olefins and saturated hydrocarbons based on terminal phenyl group (95% yield, 101.3 mg);  $^1\text{H}$  NMR (400 MHz,  $\text{CD}_2\text{Cl}_2$ )  $\delta$  8.29-8.22 (br m), 8.17-8.07 (br m), 7.29-7.24 (br m), 5.83 (br s), 5.39-5.11 (br m, internal  $-\text{CH}=\text{CH}-$ ), 4.27 (br s), 4.04 (br s), 2.93 (br s), 2.59 (br s), 2.30 (br m), 2.00 (br s), 1.59 (br s), 1.29

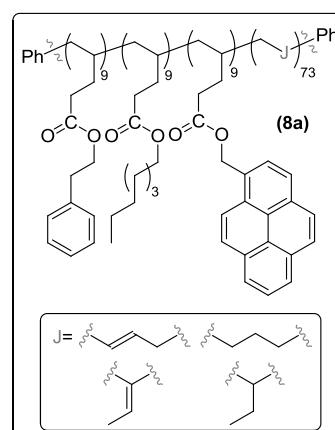



(br s), 0.99 (br m), 0.90 (br m), 0.86 (br m);  $^{13}\text{C}$  NMR (100 MHz,  $\text{CDCl}_3$ )  $\delta$  174.1 (CO), 137.9, 131.7, 131.2, 130.7, 129.5, 128.9, 128.5, 127.8, 127.3, 126.6, 126.1, 125.5, 124.9, 124.6, 122.9, 64.8, 64.6, 64.5, 38.9, 37.1, 35.2, 33.2, 32.7, 32.4, 31.8, 29.8, 29.0, 28.7, 28.3, 27.7, 26.7, 26.0, 23.0, 22.7, 14.2; IR spectrum ( $\text{CDCl}_3$ ) 3029, 2923, 2855, 2073, 2046, 2017, 1997, 1969, 1935, 1734, 1604, 1553, 1496, 1455, 1379, 1264, 1247, 1165, 1064, 1031, 1004, 969, 846, 739, 701, 682  $\text{cm}^{-1}$ ;  $M_n = 4521$ ,  $M_w = 10637$ , PDI = 2.35.

### - Calculation of isolated yield of ester-containing modified polybutadiene

$$\text{mole of modified polybutadiene (mmol)} = \frac{\text{Weight of product polymer}}{\frac{A \text{ mg} \times (\text{weight ratio of ester in modified polybutadiene})}{(1800 \text{ mg/mmol} \times 0.45) + (15 \times (\text{incorporation rate}) \times B) \text{ mg/mmol}}}$$

Weight ratio can be calculated by  $^1\text{H}$  NMR spectroscopy.

Average molecular weight of polybutadiene (**1**) is 1800. Polybutadiene (**1**) contains 45% vinyl. Molecular weight of vinyl groups is 810 (= 1800  $\times$  0.45).

Number of vinyl group. There are fifteen vinyl groups. (= 810 / 54.09)

Increased molecular weight when one vinyl converts to one ester

Incorporation rate of ester group was calculated based on terminal phenyl in modified polybutadiene and calculated as:

$$\frac{(\text{ratio of ester group in modified polybutadiene})}{(45, \text{vinyl}\%)}$$

### <Calculation of isolated yield of 2-phenylethyl ester-containing modified polybutadiene (**6a**)>

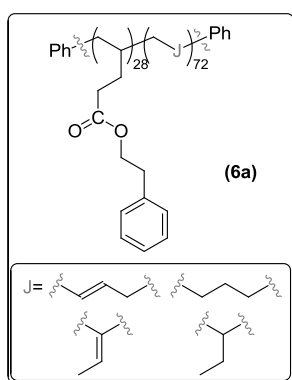

Weight ratio can be calculated by  $^1\text{H}$  NMR spectroscopy.

For example, 2-phenylethyl ester-containing modified polybutadiene (**6a**) contains 28% of 2-phenylethyl ester and 72% of reduced or isomerized or internal olefin part. Molecular weight of ester monomer is 204.26 g/mol and the remaining part monomer is 54.09 g/mol.

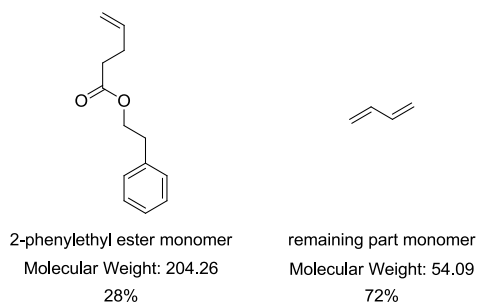

$$\text{weight ratio of ester in modified polybutadiene} = \frac{204.26 \text{ g/mol} \times 0.28}{(204.26 \text{ g/mol} \times 0.28) + (54.09 \text{ g/mol} \times 0.72)}$$

$$= 0.595$$

The mole of 2-phenylethyl ester-containing modified polybutadiene (**6a**) :

$$\begin{aligned} \text{mole of 2-phenylethyl ester-containing modified polybutadiene (6a) (mmol)} &= \frac{73.9 \text{ mg} \times 0.595}{(1800 \text{ mg/mmol} \times 0.45) + (15 \times 0.62 \times 149.16) \text{ mg/mmol}} \\ &= \frac{43.9705 \text{ mg}}{810 \text{ mg/mmol} + 1387.188 \text{ mg/mmol}} \\ &= \frac{43.9705 \text{ mg}}{2197.19 \text{ mg/mmol}} = 0.02001 \text{ mmol} \end{aligned}$$

$$\text{mole of starting Polybutadiene (1) (mmol)} = \frac{50 \text{ mg}}{1800 \text{ mg/mmol}} = 0.02778 \text{ mmol}$$

The yield of 2-phenylethyl ester-containing modified polybutadiene (**6a**) :

$$\text{yield of 2-phenylethyl ester-containing modified polybutadiene (6a) (\%)} = \frac{0.02001 \text{ mmol}}{0.02778 \text{ mmol}} \times 100 = 72.03 \approx 72 \%$$

# $^1\text{H}$ and $^{13}\text{C}$ NMR SPECTRA

$^1\text{H}$  NMR peaks (ppm): 7.2632, 7.2449, 7.1794, 5.6569, 5.6318, 5.6155, 5.6000, 5.7895, 5.7735, 5.6013, 5.5810, 5.3892, 5.3769, 5.3226, 5.3200, 5.3176, 4.9694, 2.6637, 2.6466, 2.5308, 2.3899, 2.0360, 1.5414, 1.4506, 1.4257, 1.2893, 0.9103, 0.6777, 0.6604.

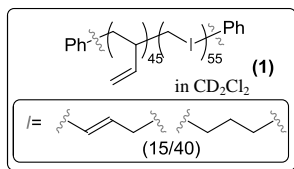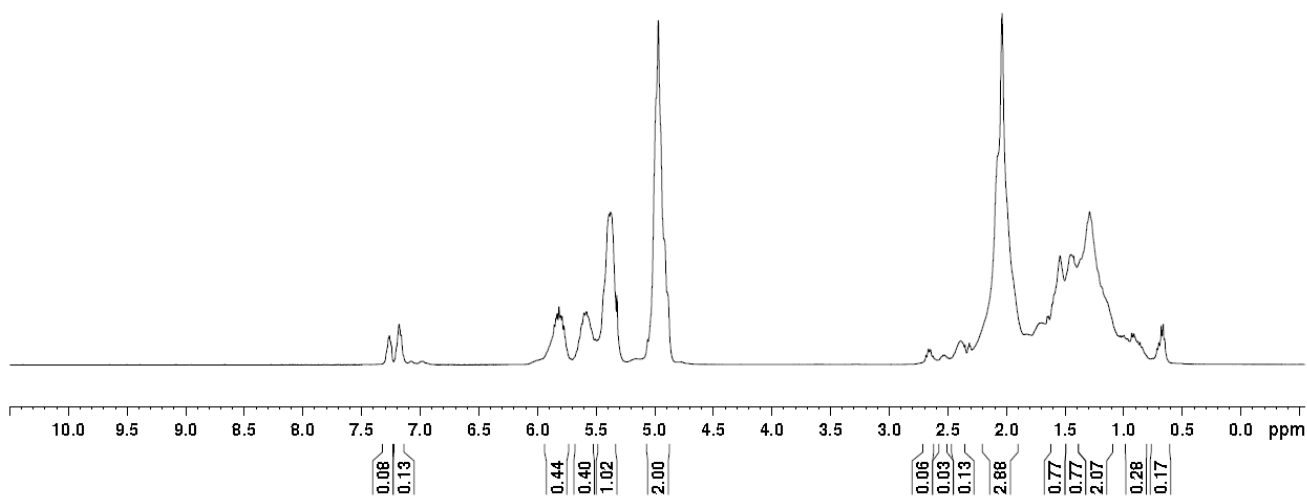

$^{13}\text{C}$  NMR peaks (ppm): 144.371, 144.111, 143.505, 143.196, 142.980, 142.932, 142.685, 131.839, 130.668, 130.227, 130.113, 129.720, 129.544, 129.376, 128.540, 128.493, 128.373, 127.947, 127.805, 125.738, 114.546, 114.483, 114.065, 113.135, 112.165, 111.988, 77.577, 77.259, 76.942, 45.419, 43.853, 43.740, 42.505, 41.697, 41.260, 40.892, 40.416, 39.795, 39.428, 39.284, 38.842, 38.408, 36.323, 36.233, 35.998, 35.760, 34.448, 34.274, 34.138, 33.708, 33.620, 32.920, 32.490, 31.528, 30.514, 30.379, 27.746, 27.601, 25.264, 25.157, 25.055.

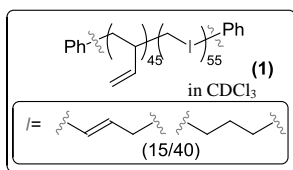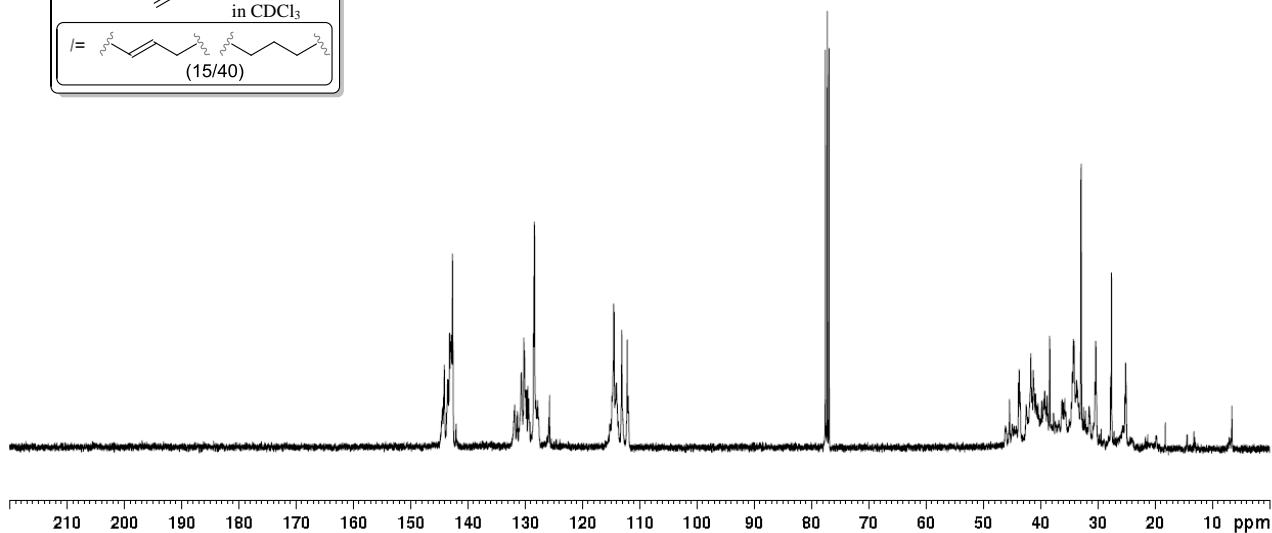

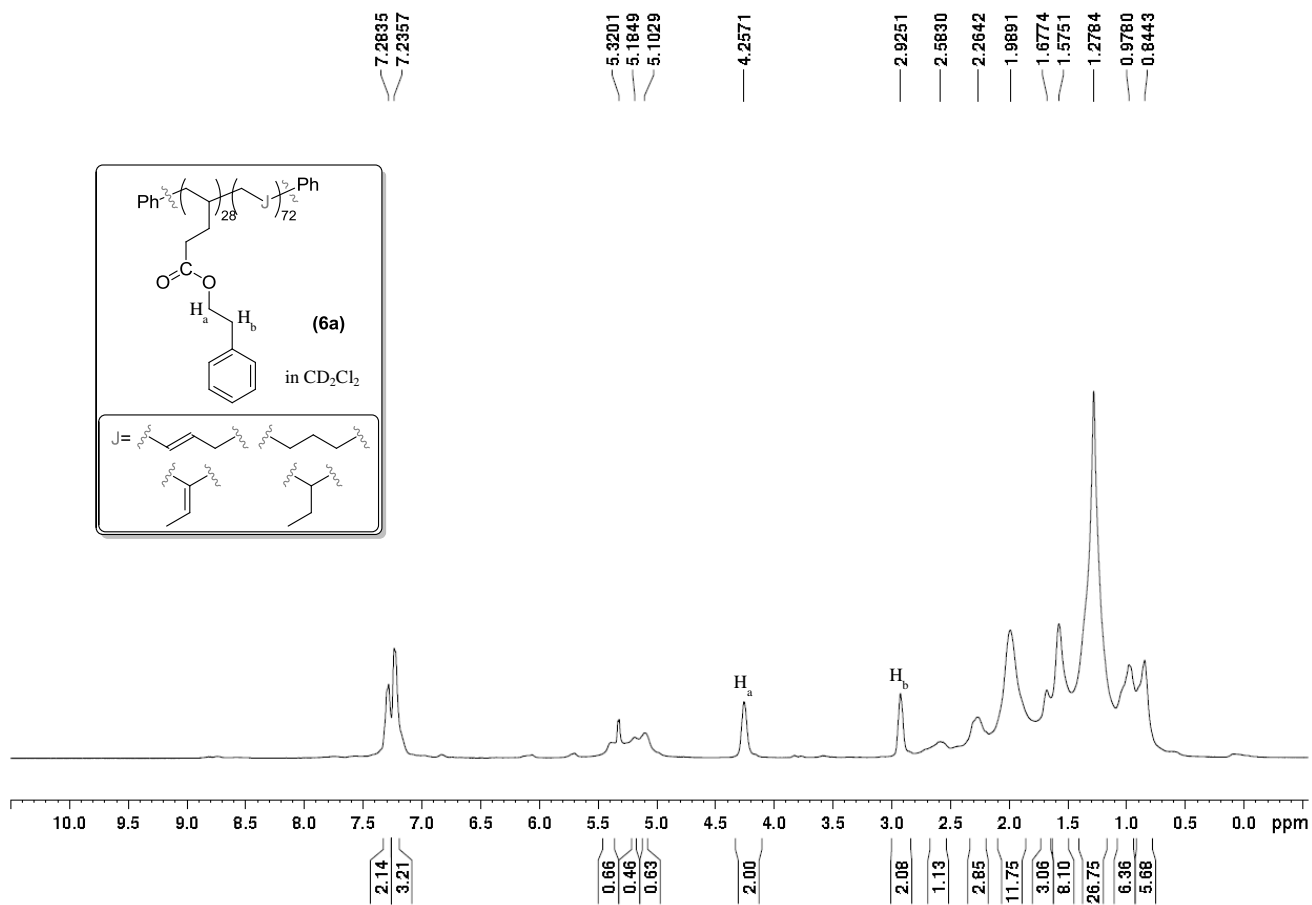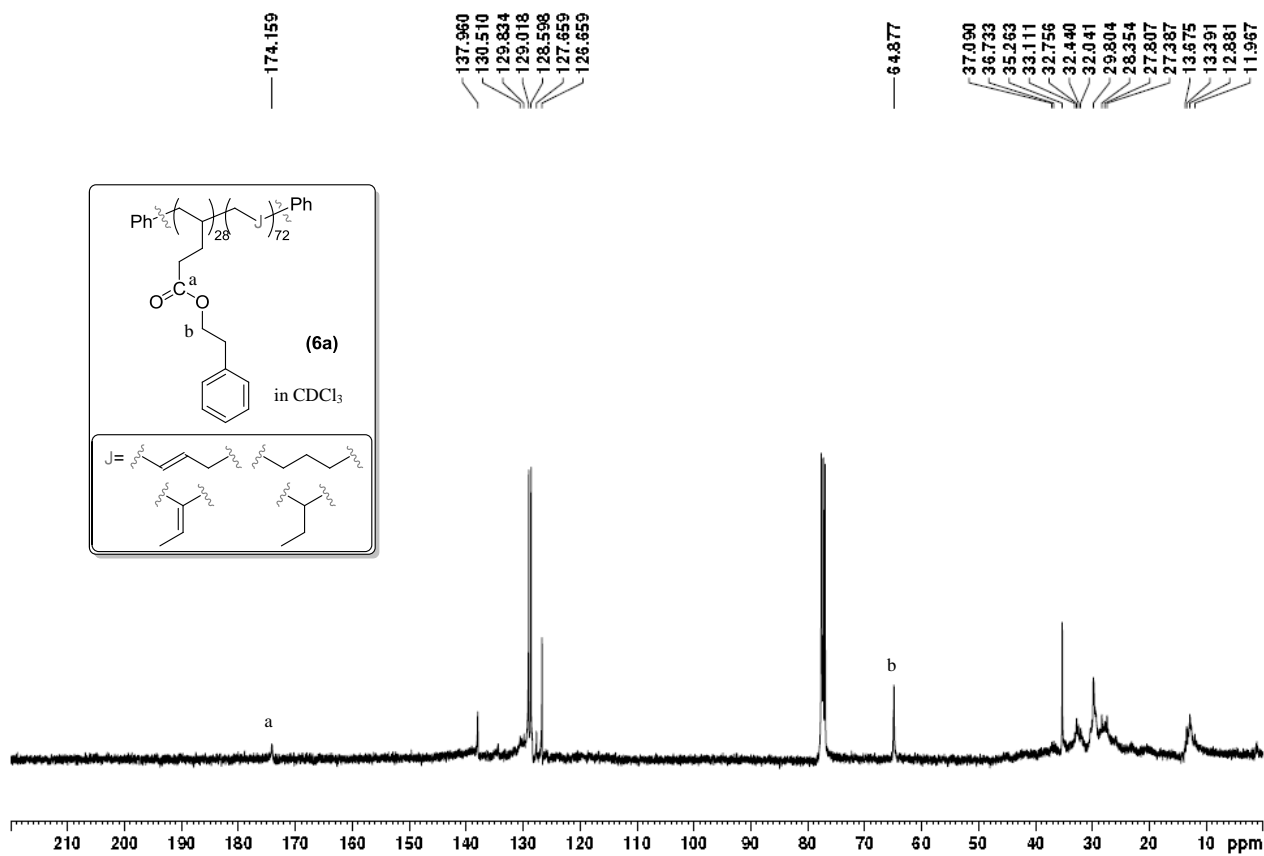

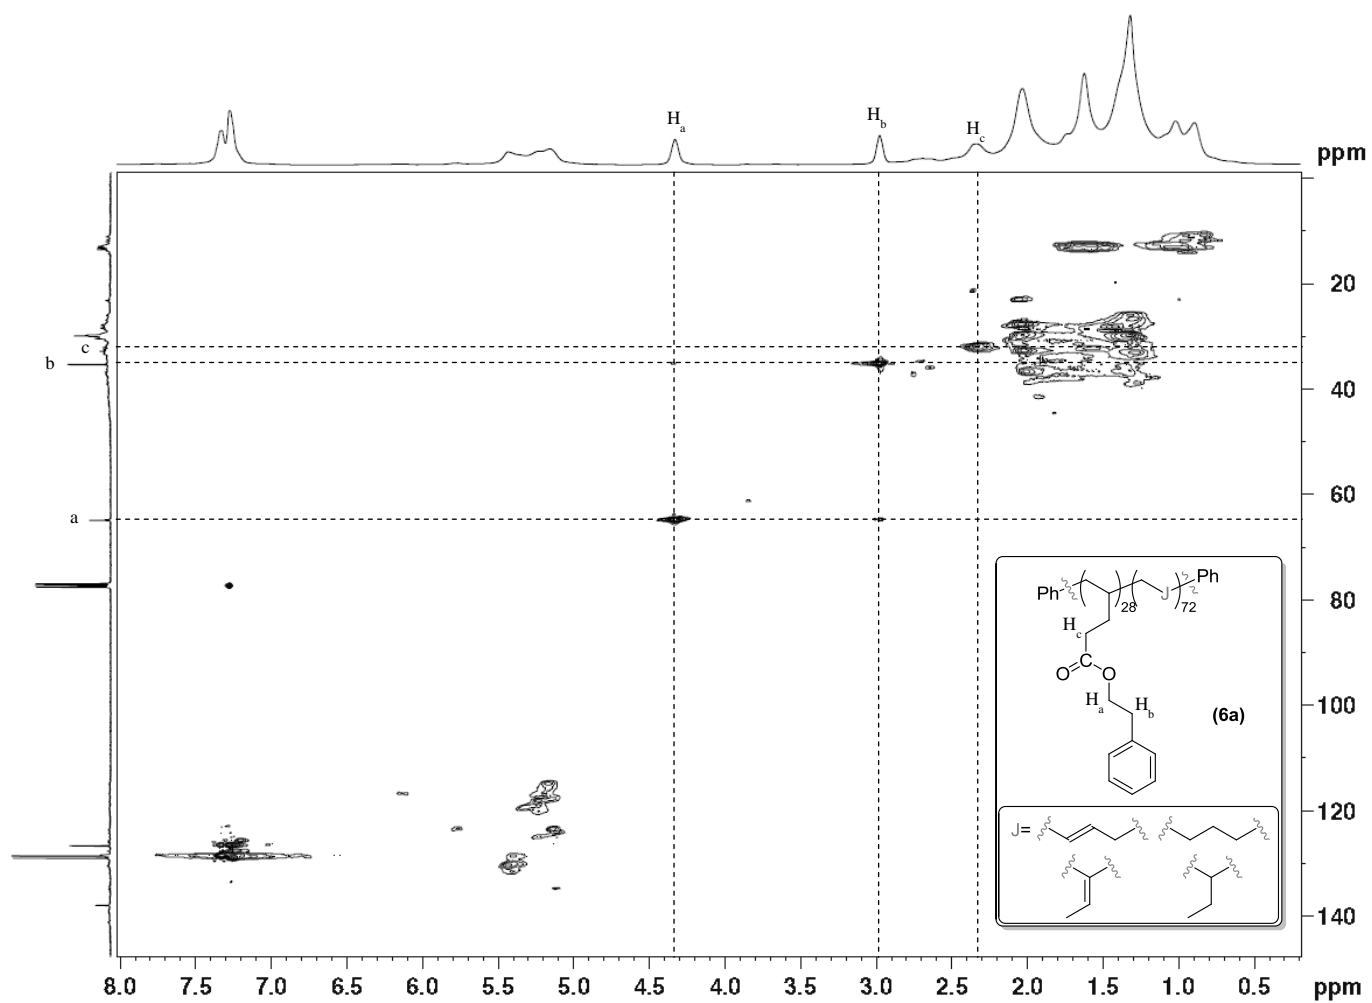

Fig S1. HSQC spectrum of **6a** in CDCl<sub>3</sub> was acquired on Bruker Advance II/DPX 400.

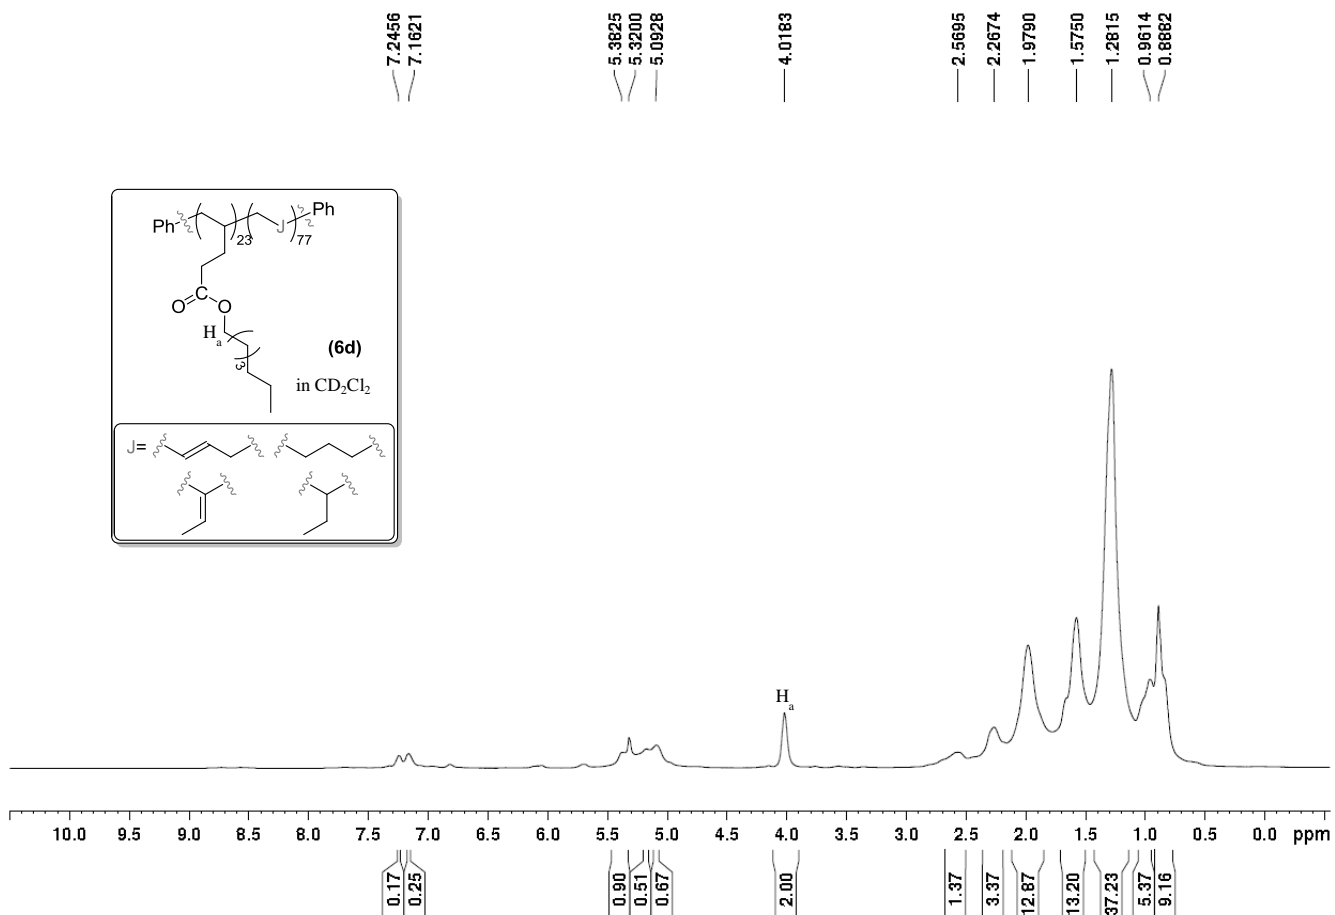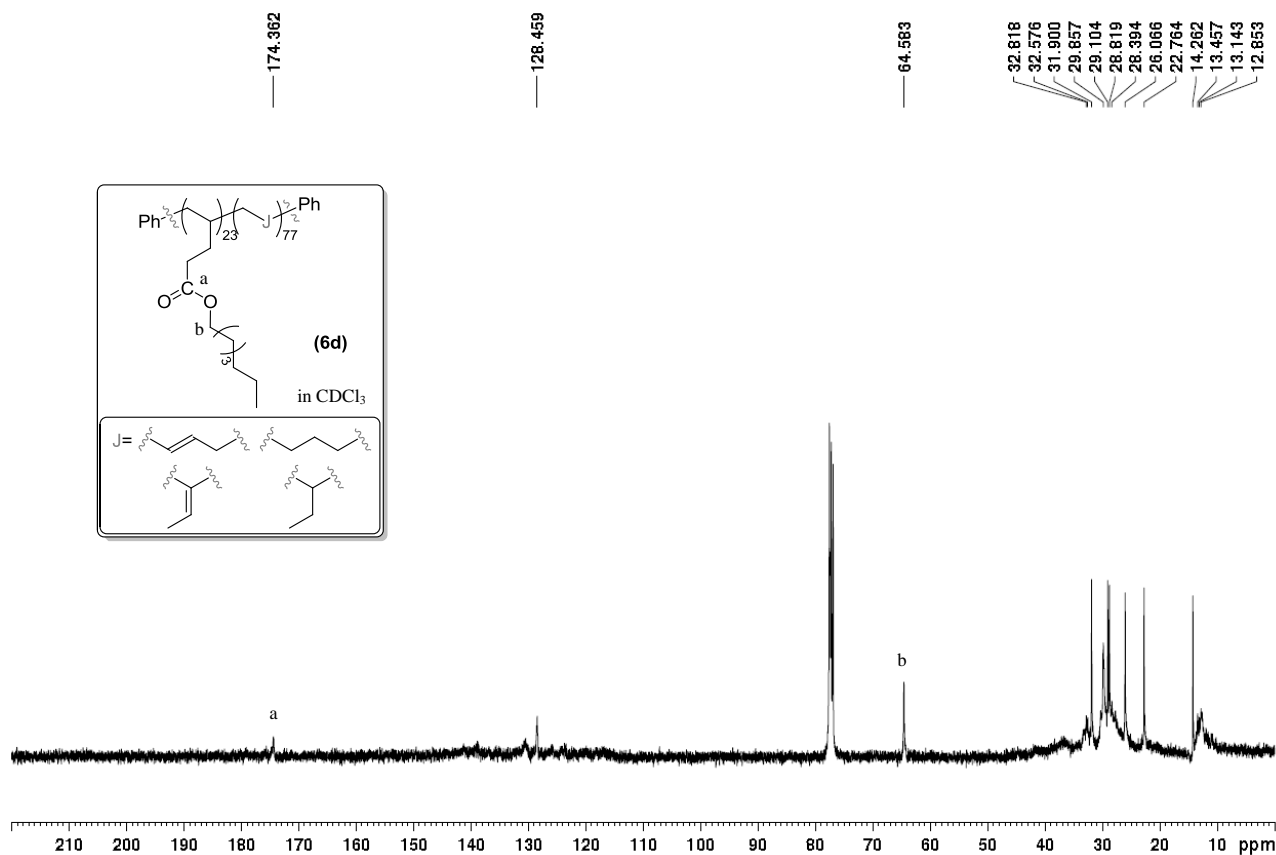

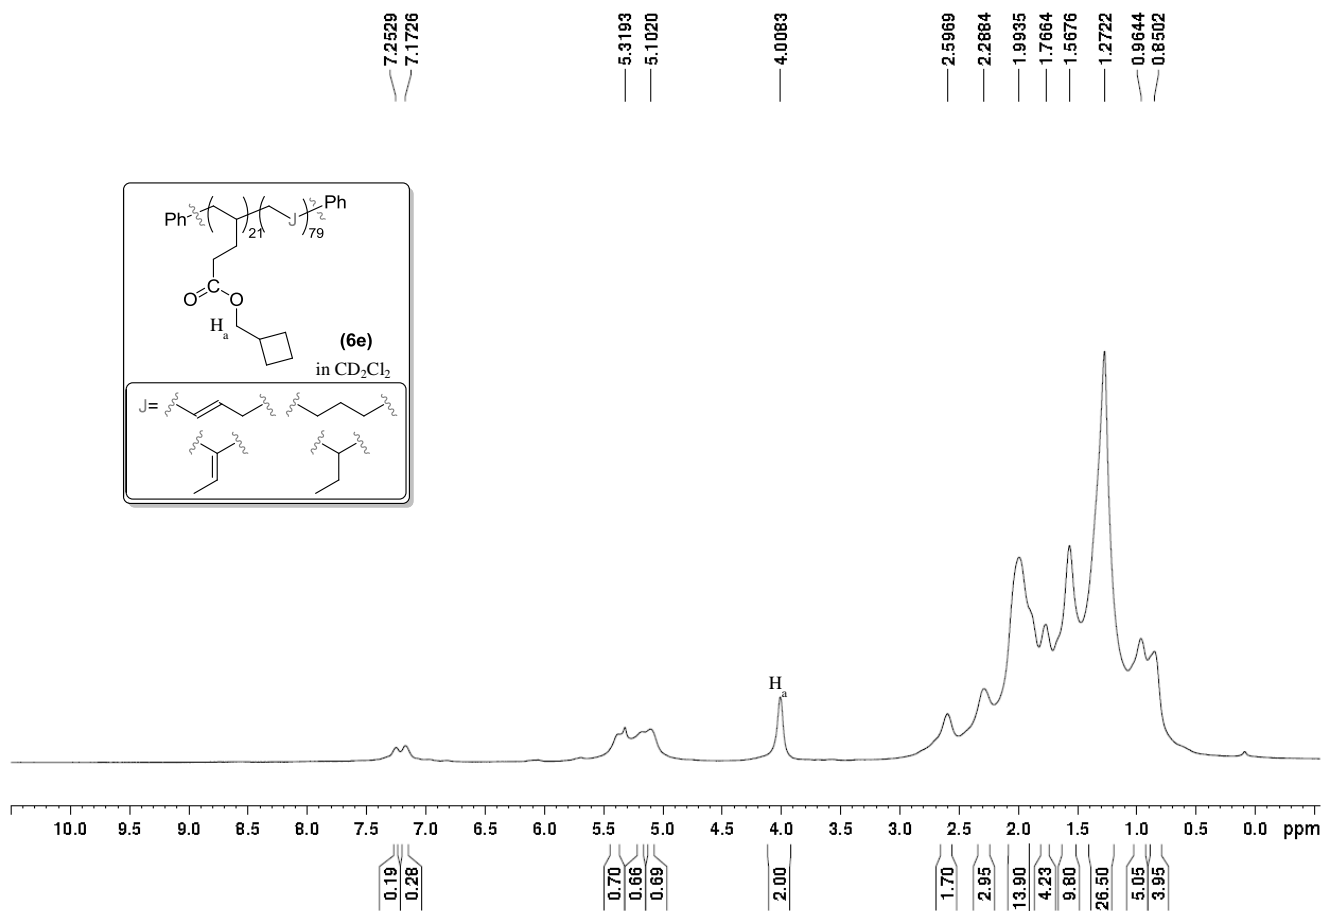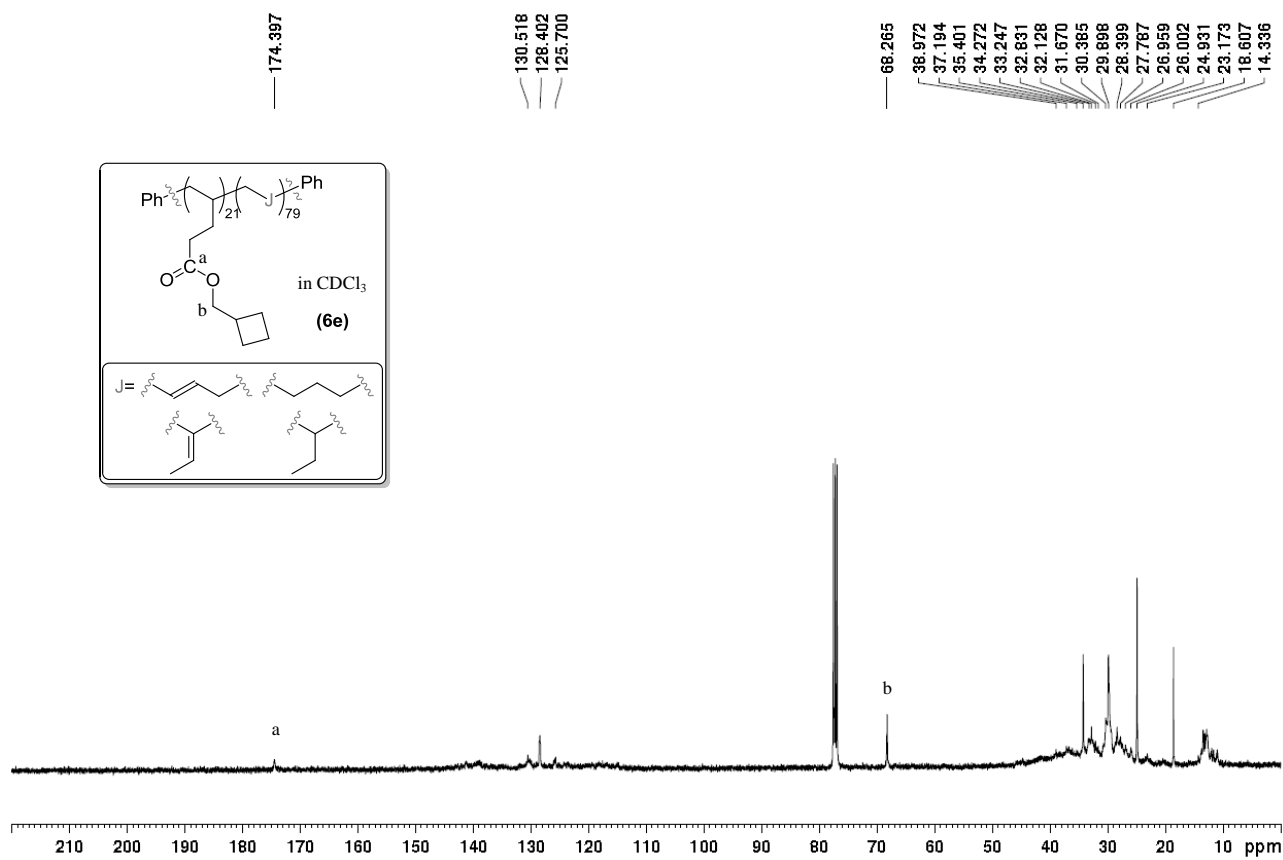

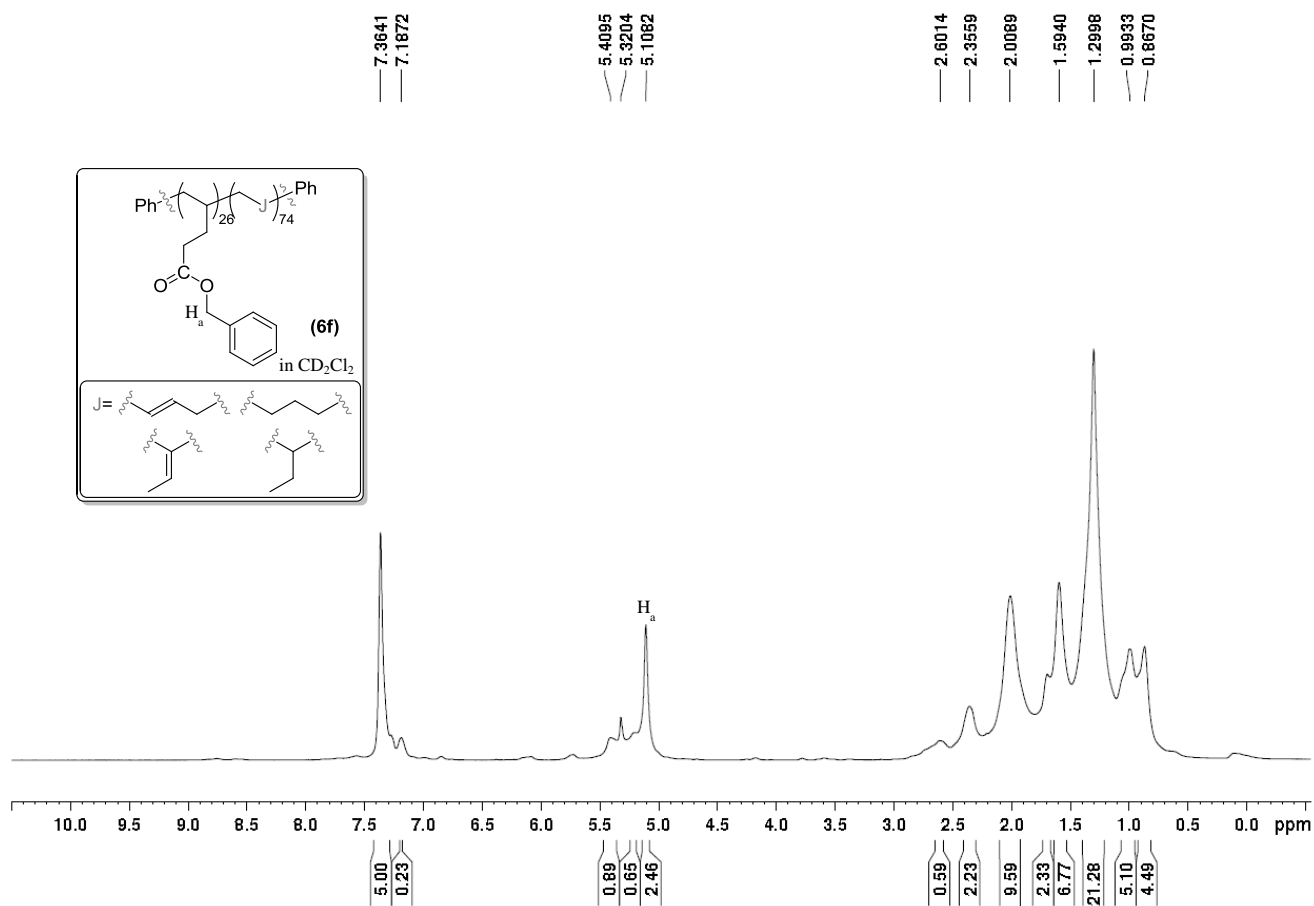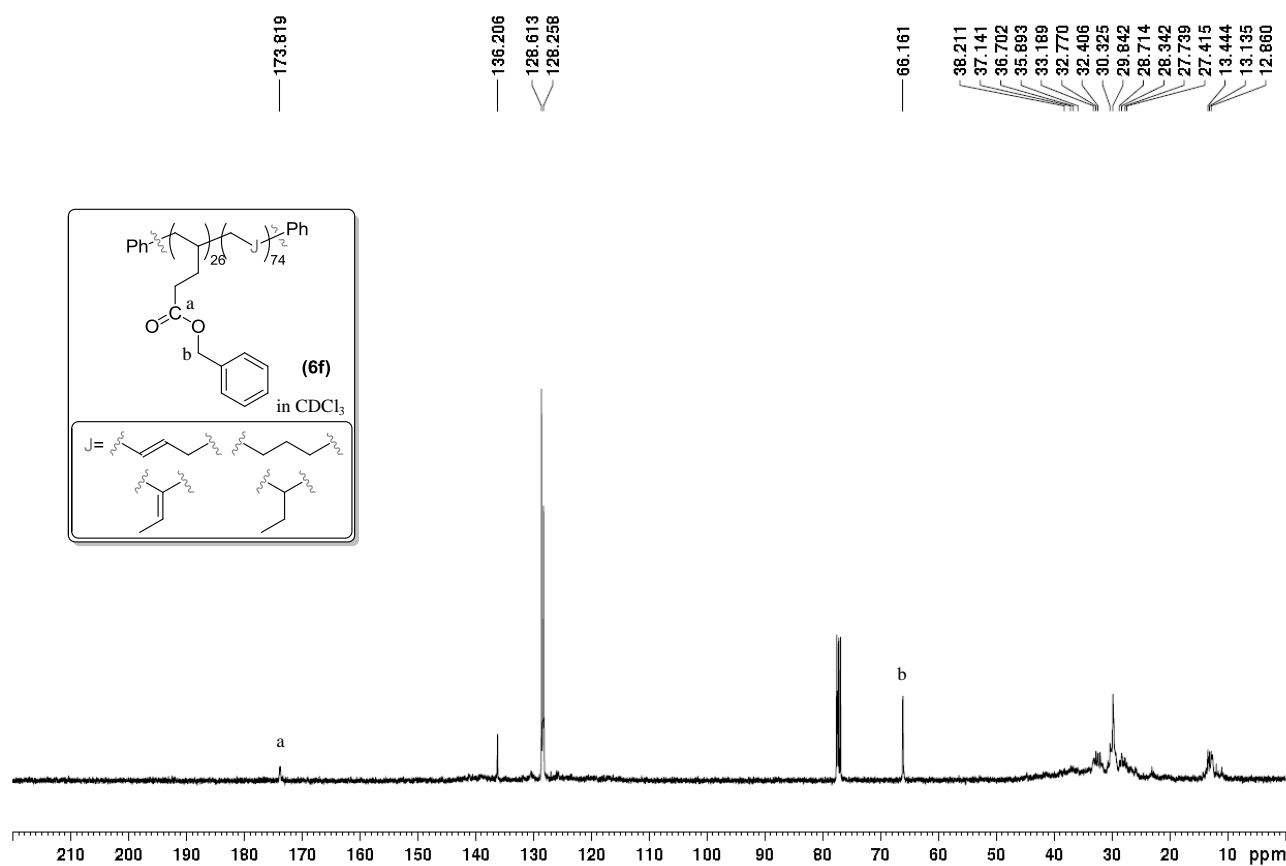



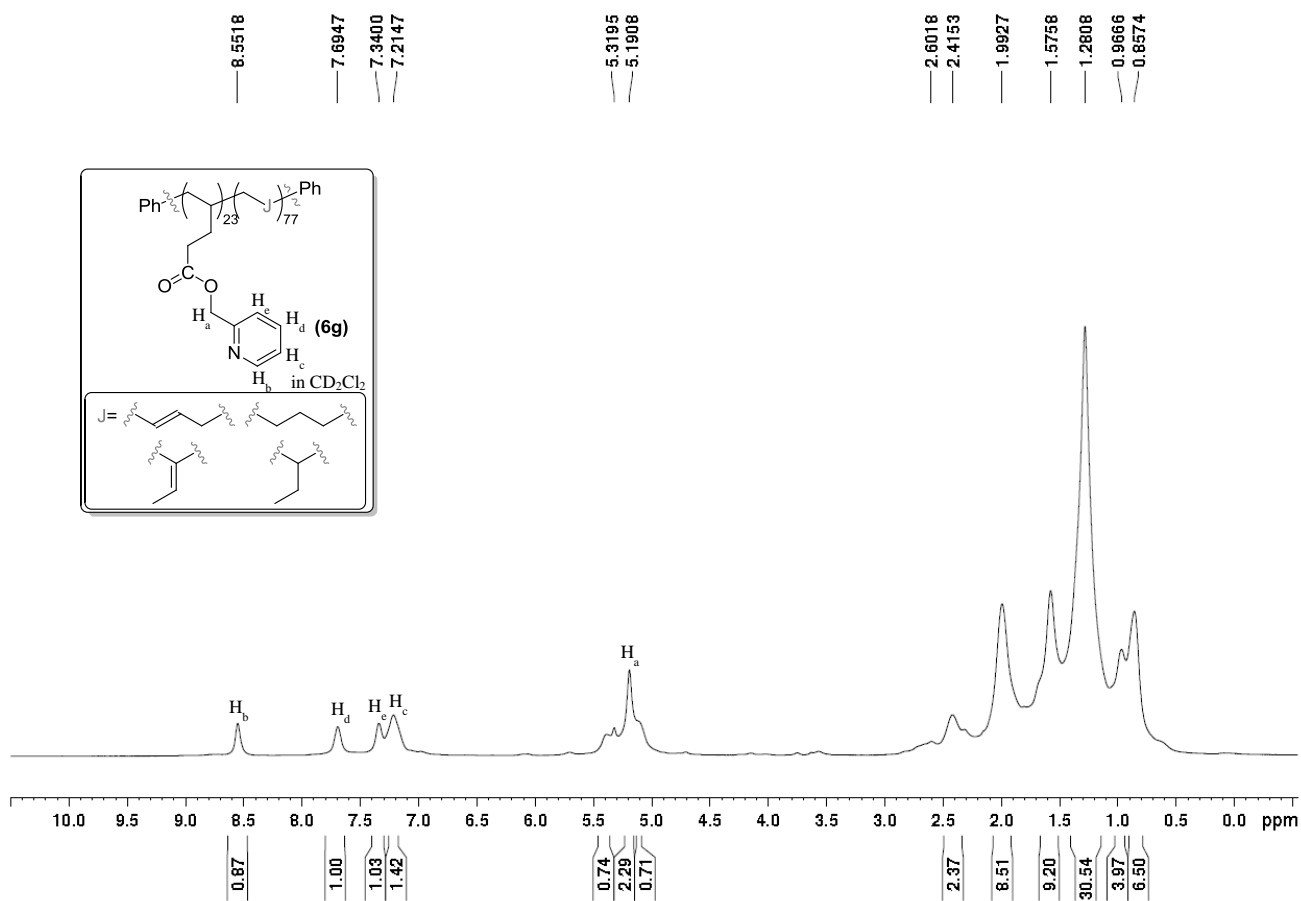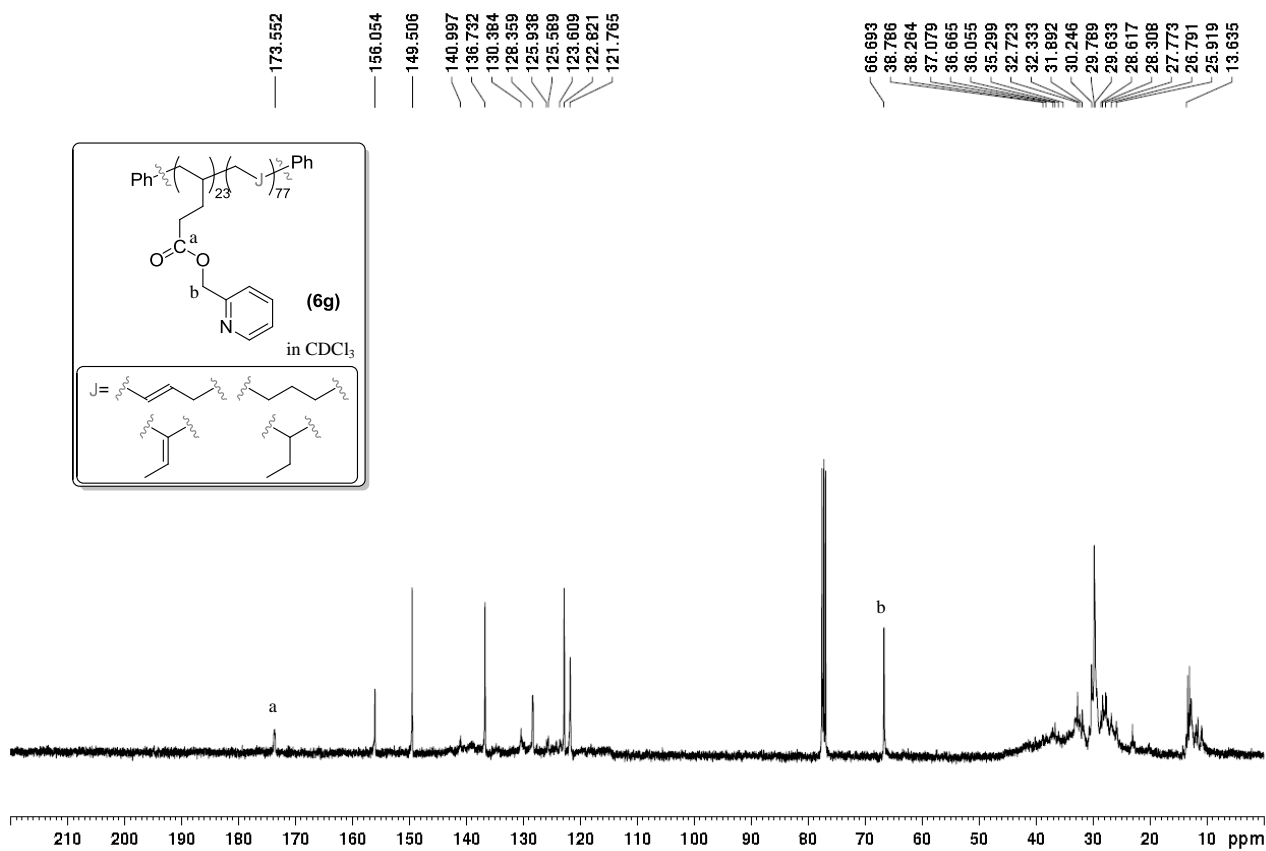

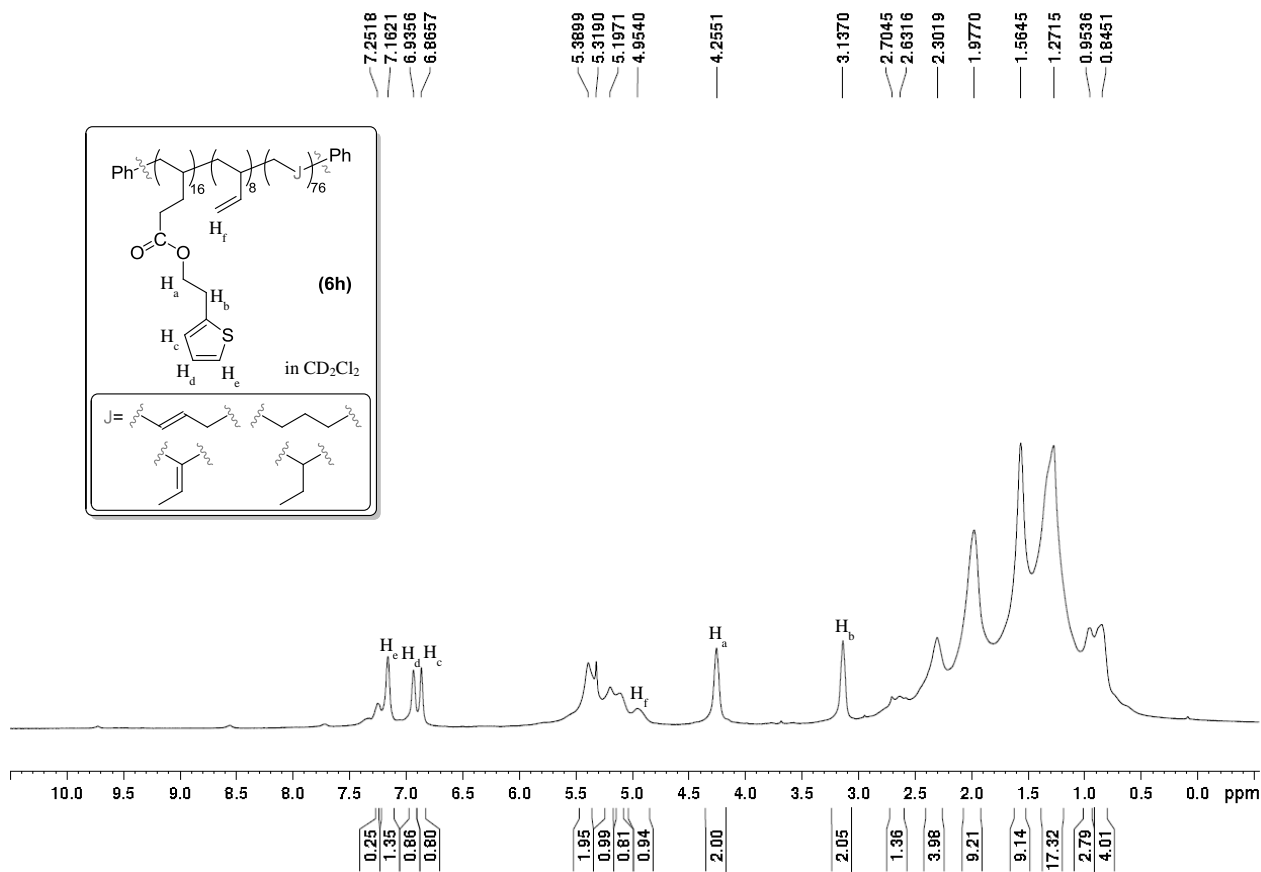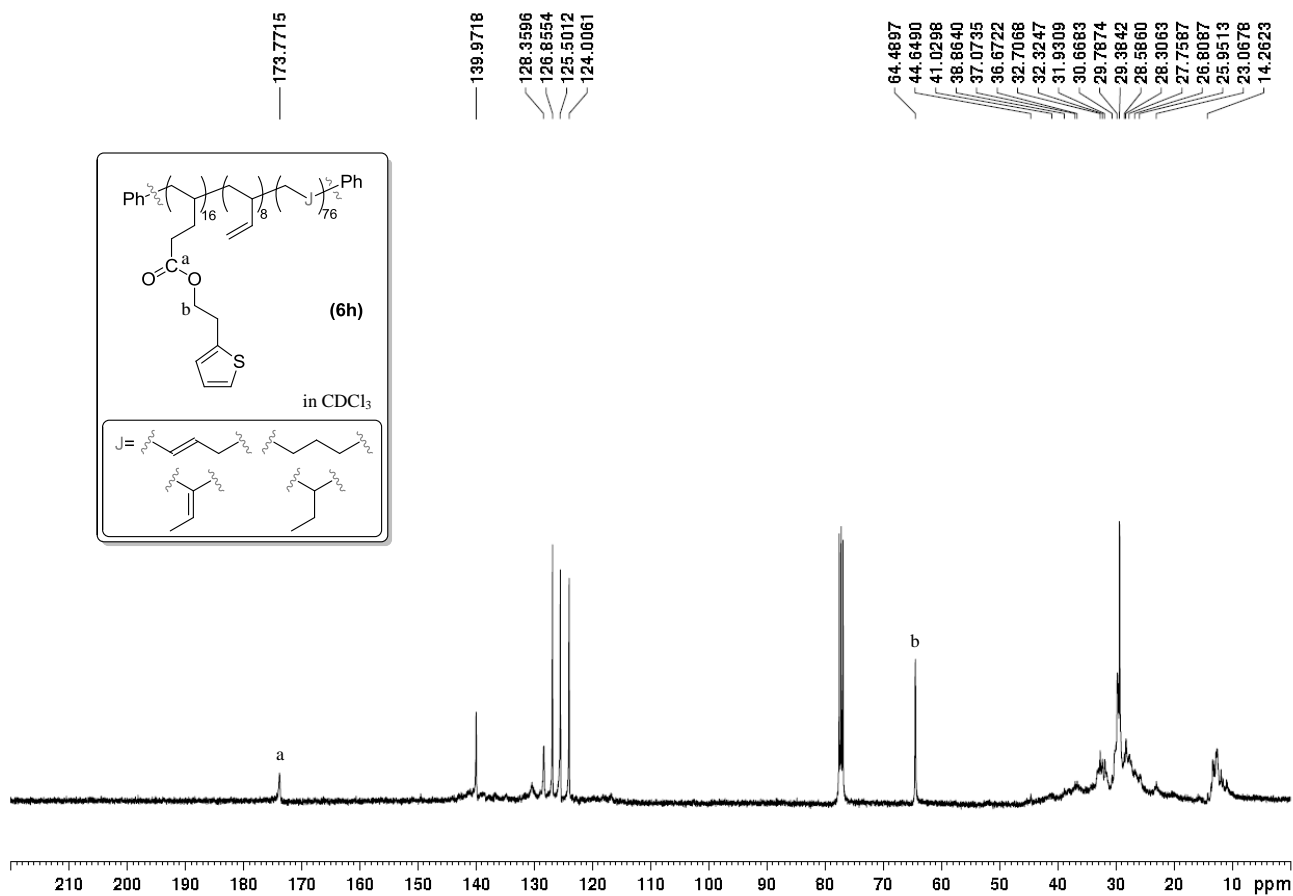

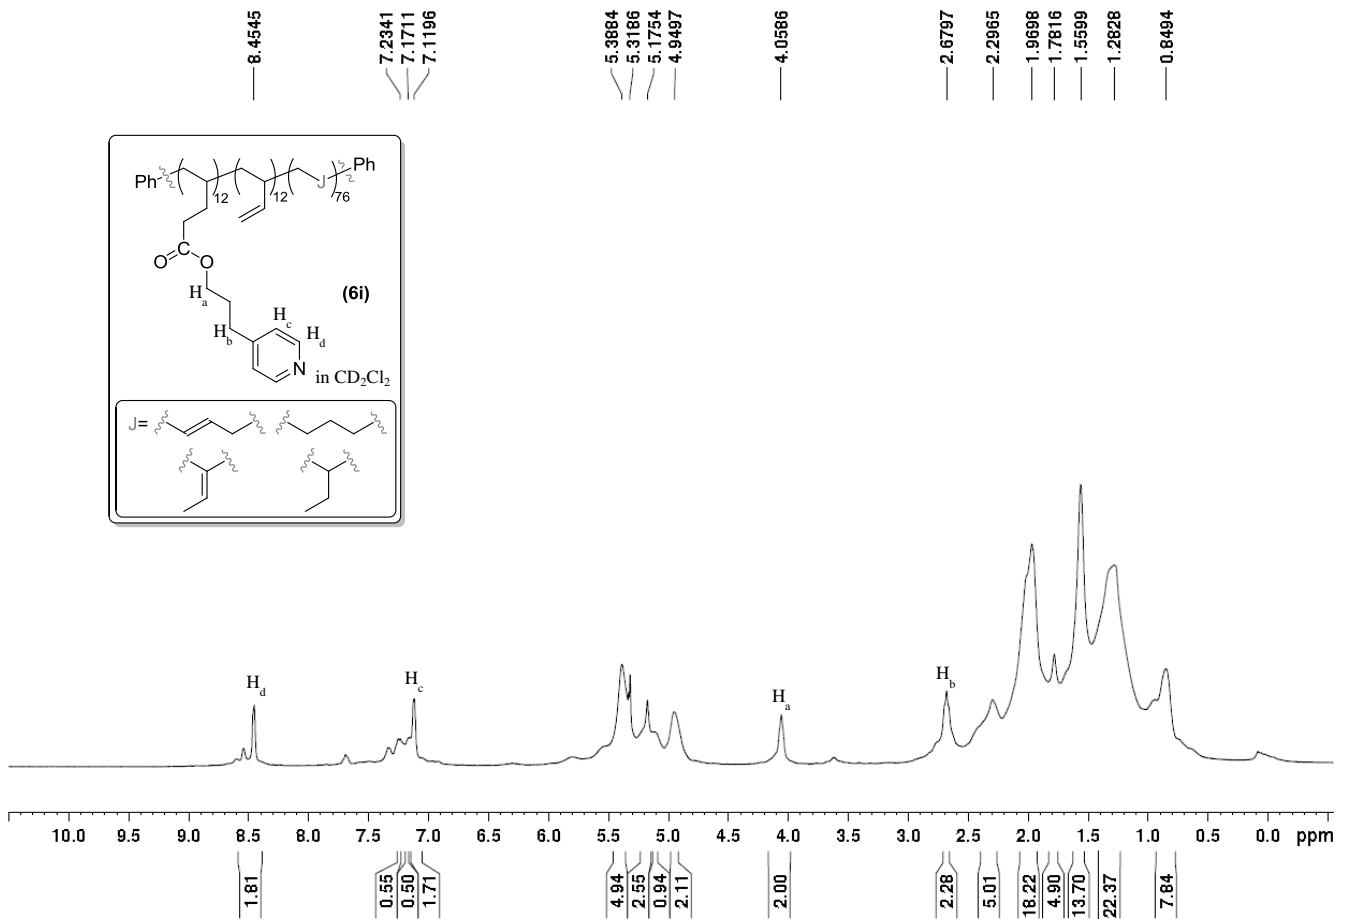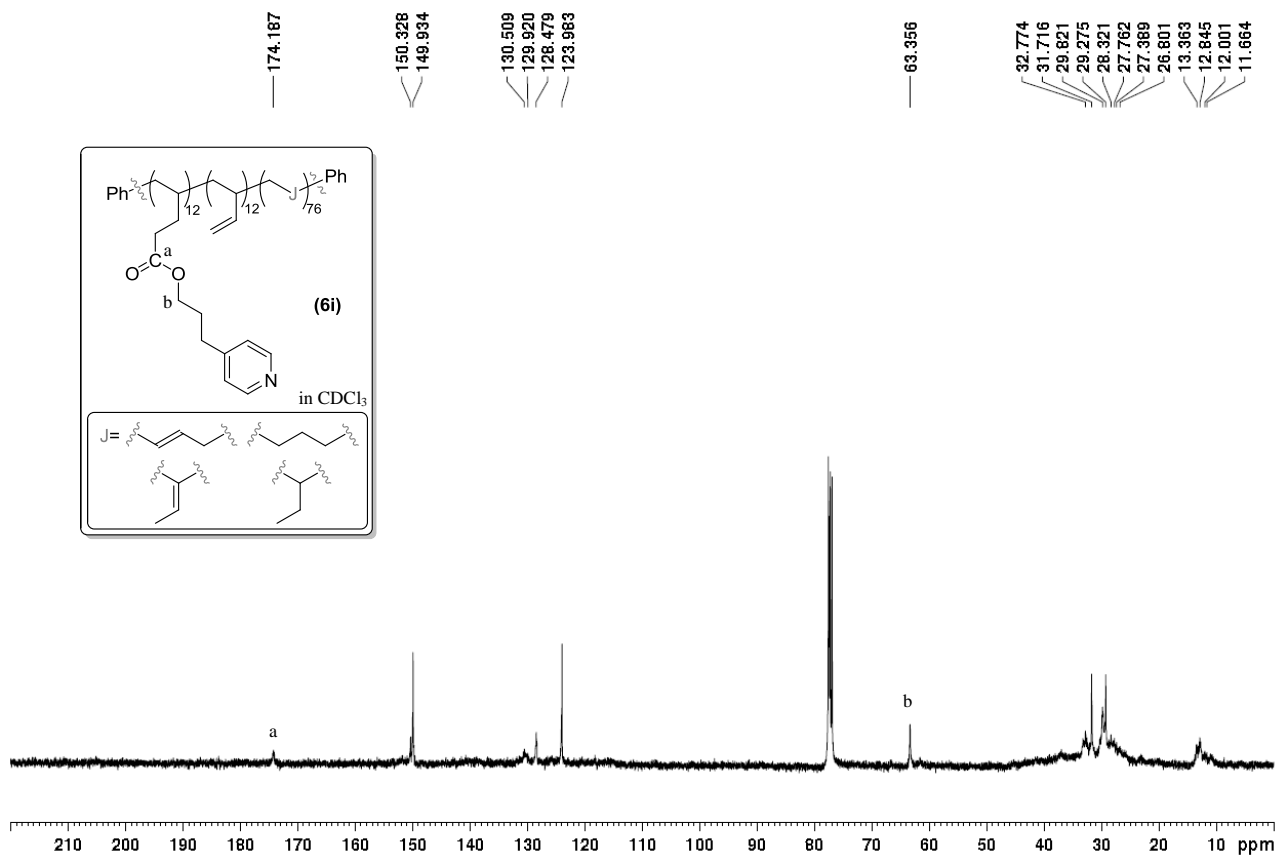

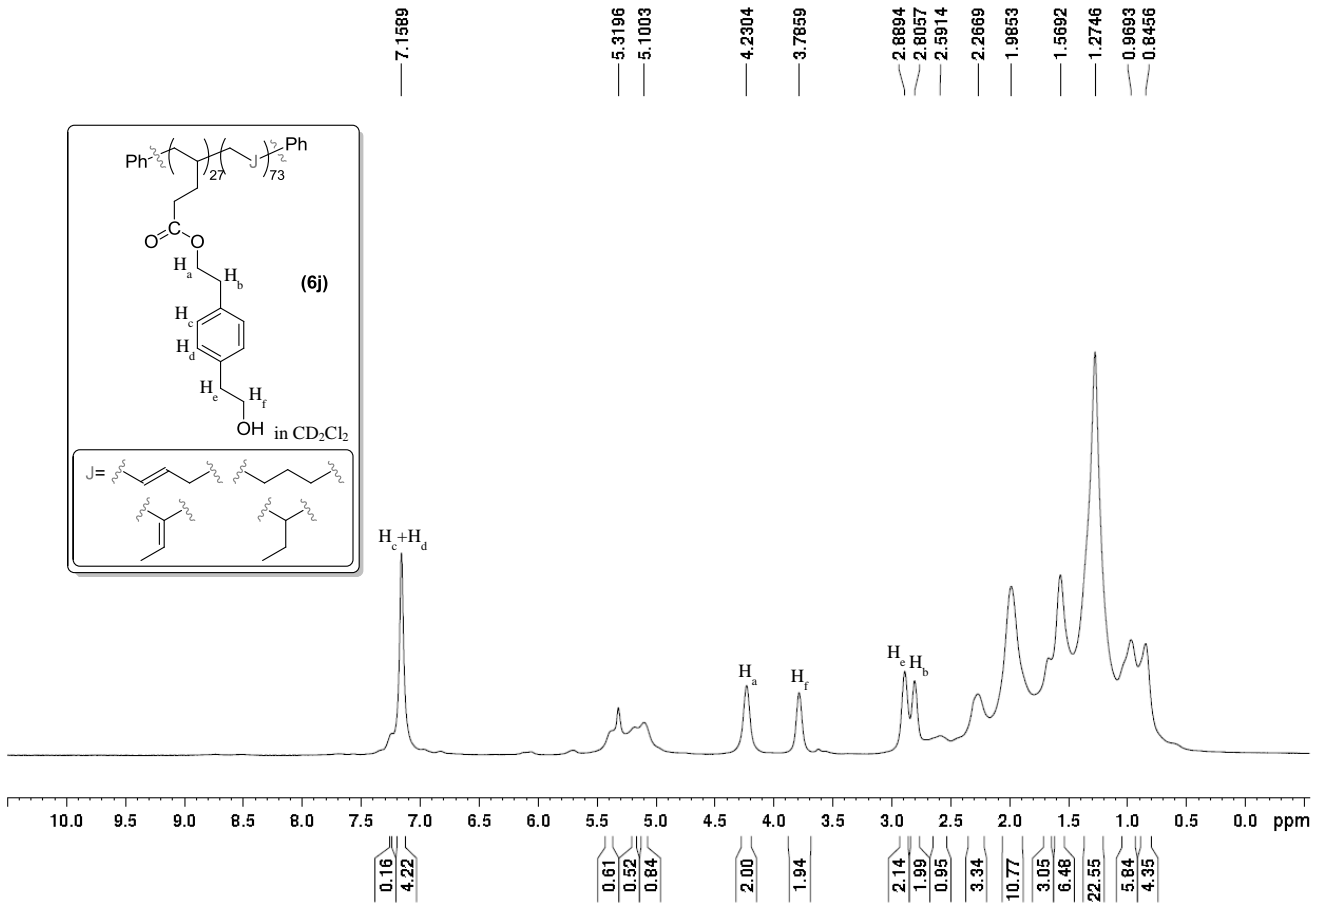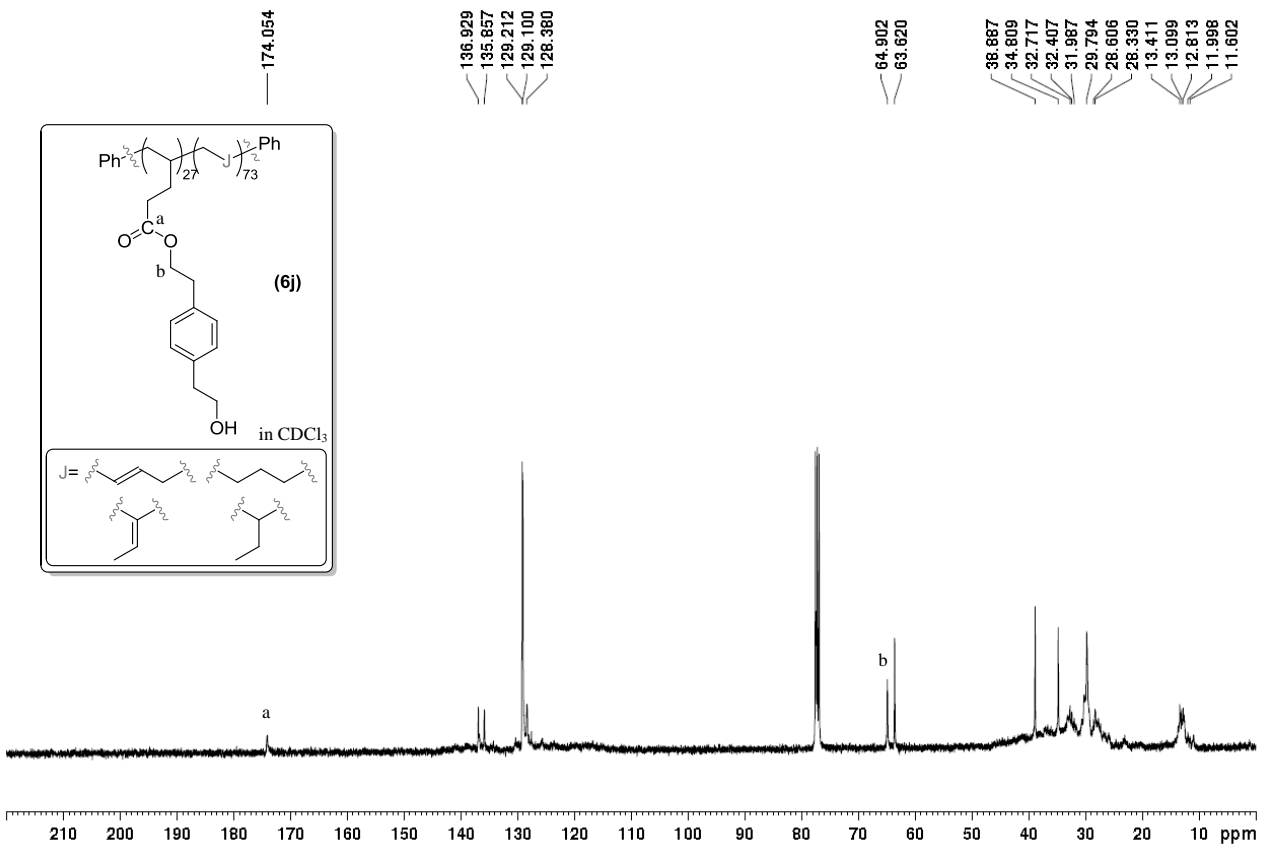

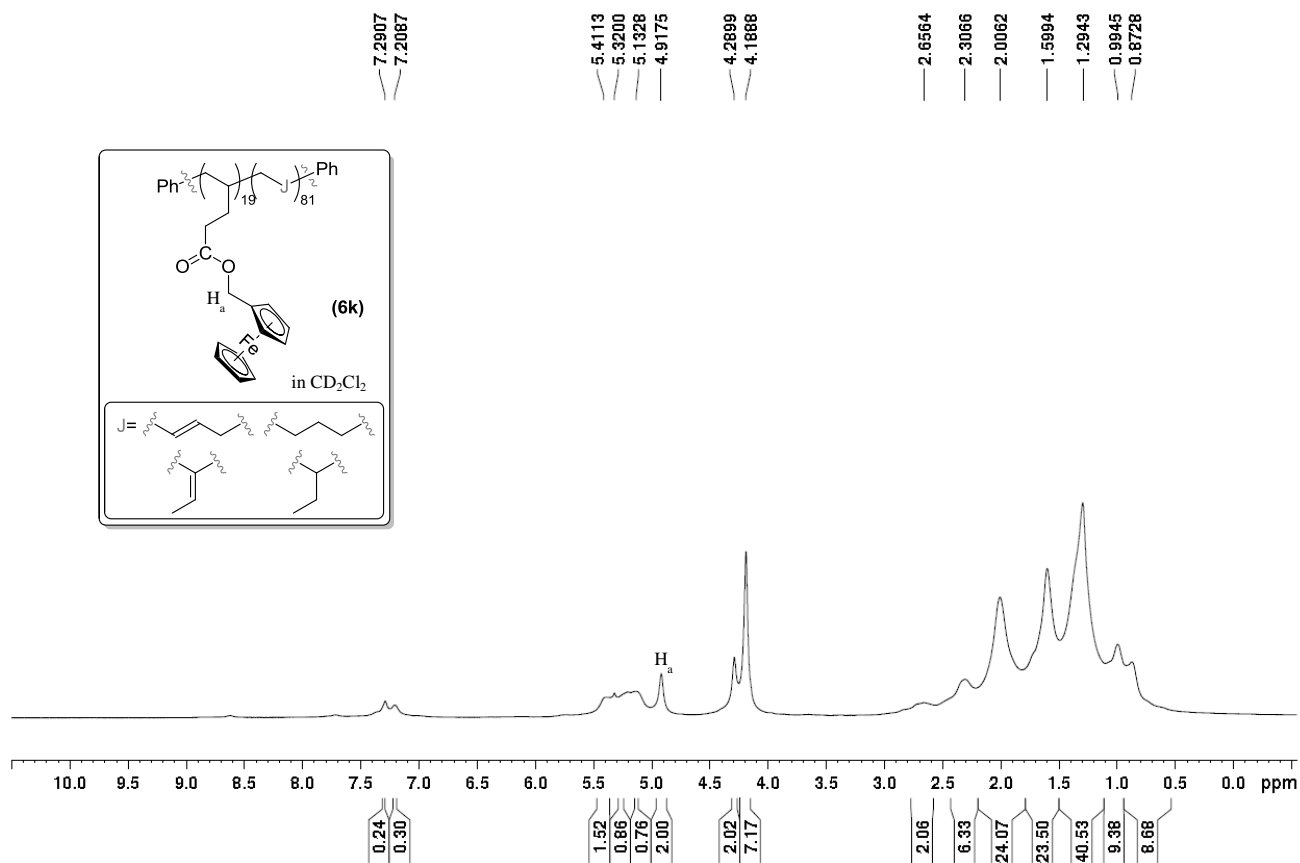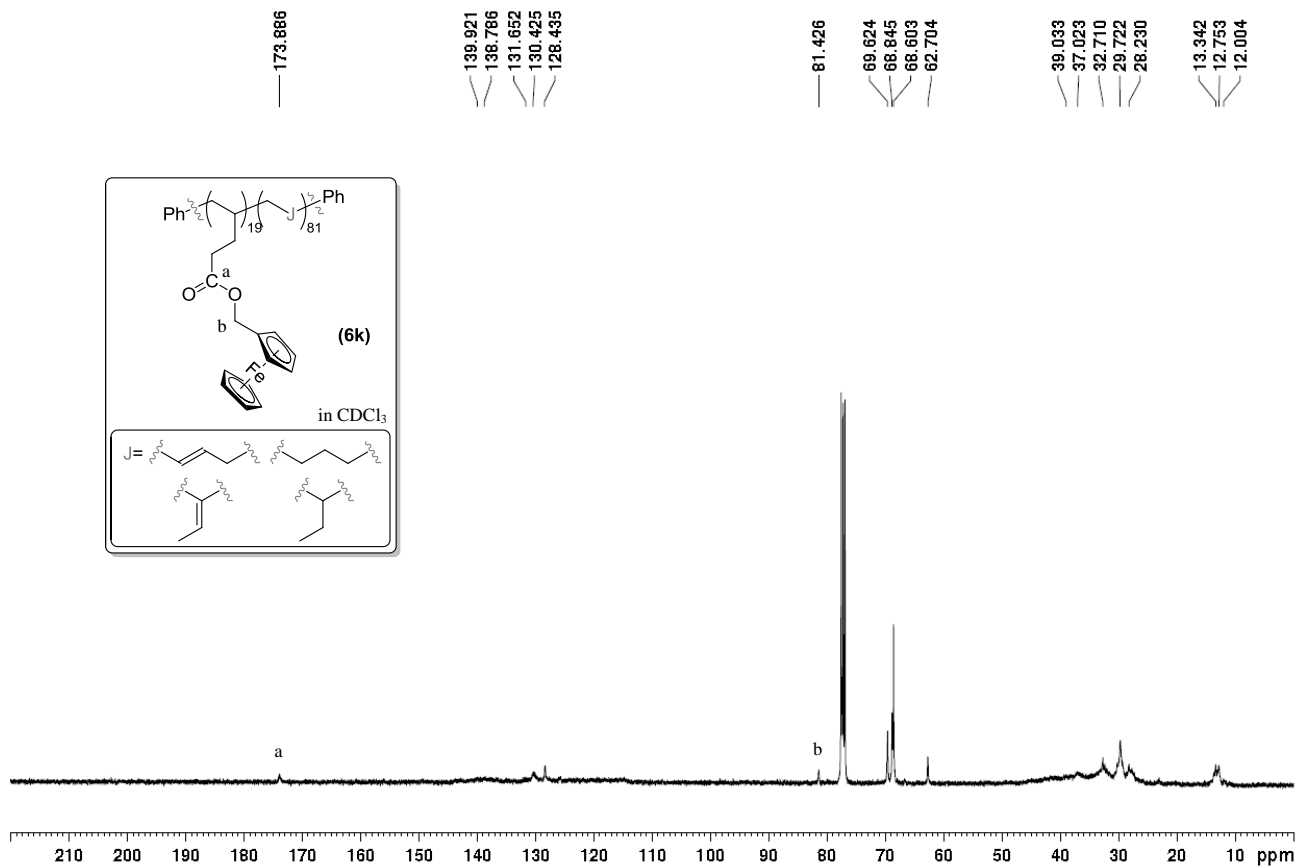

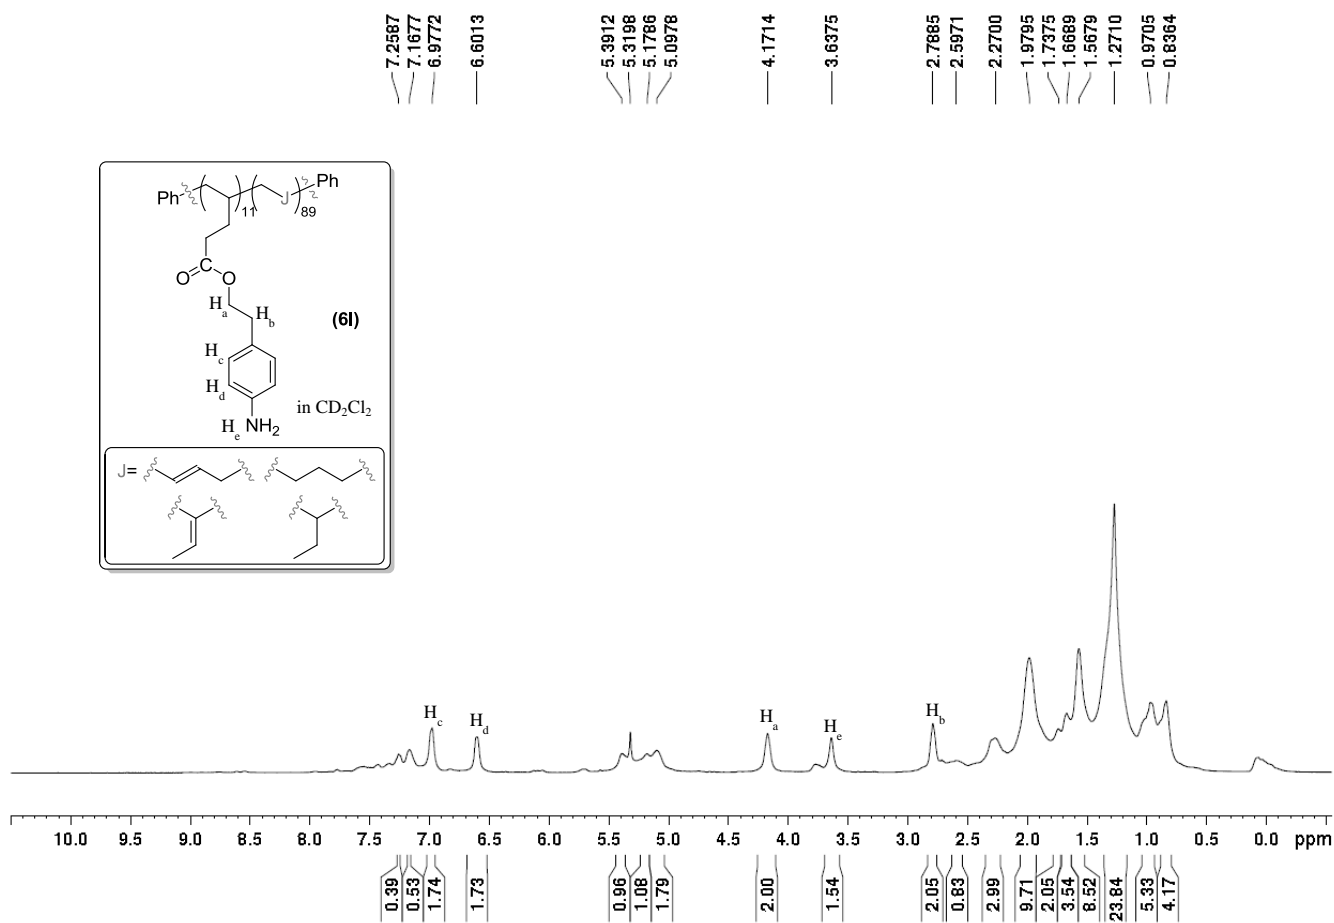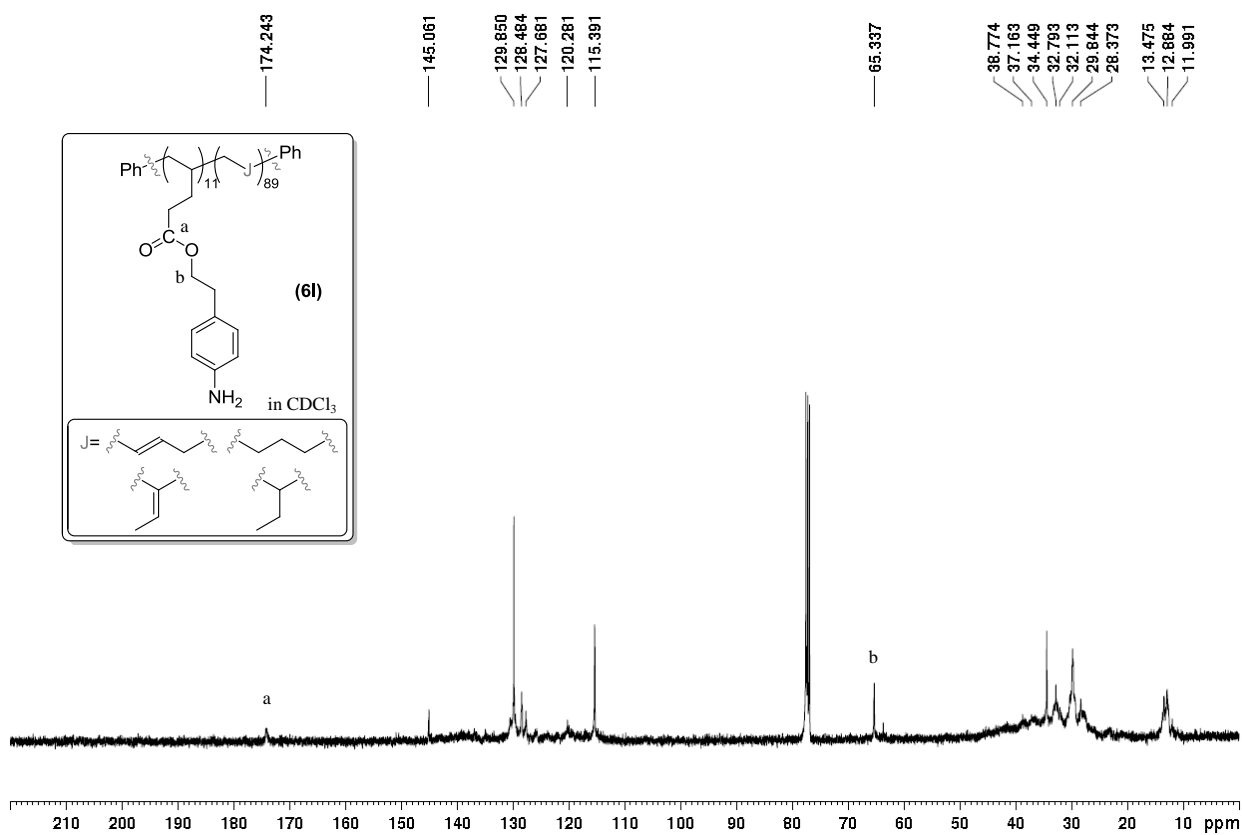

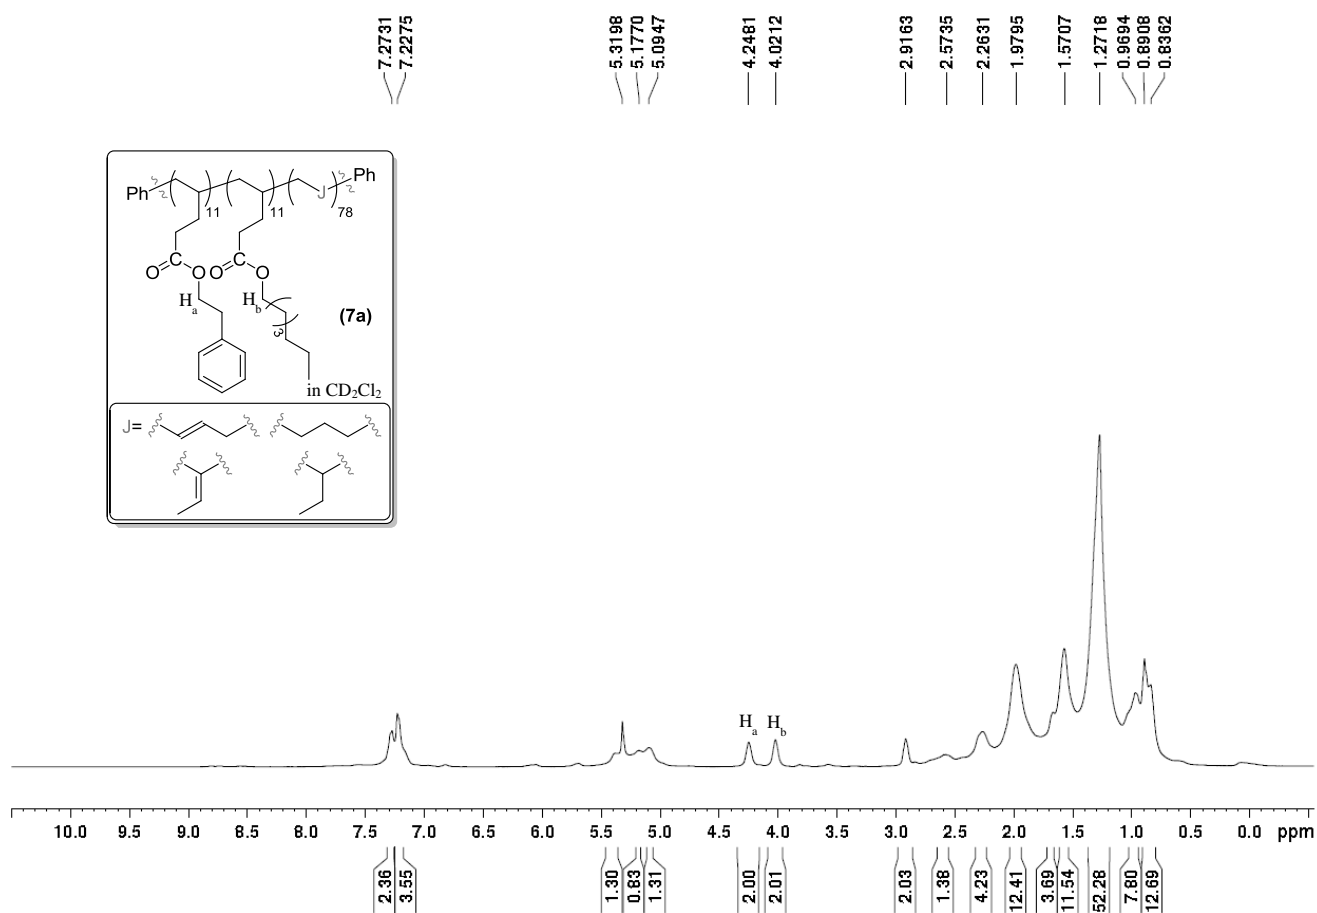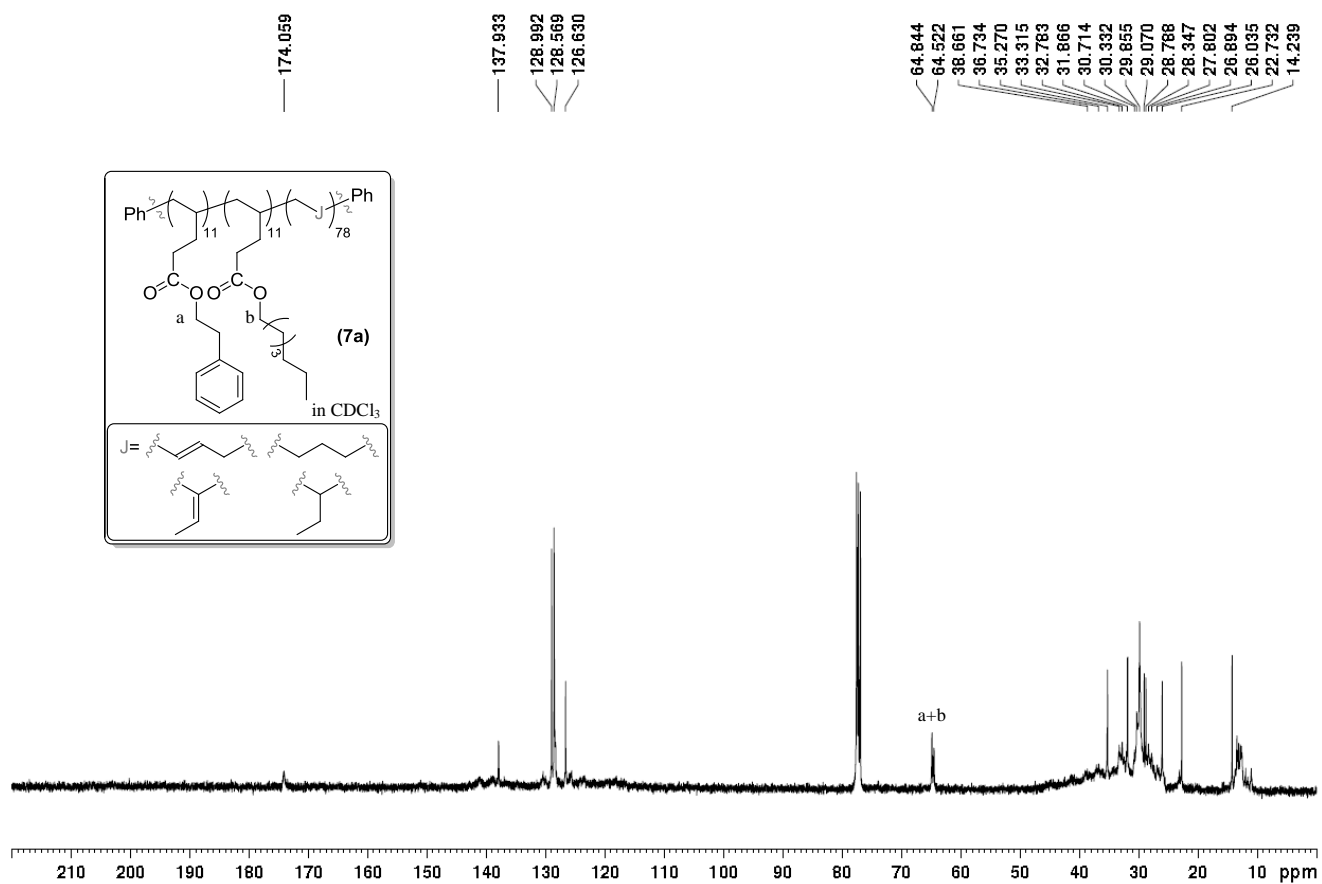

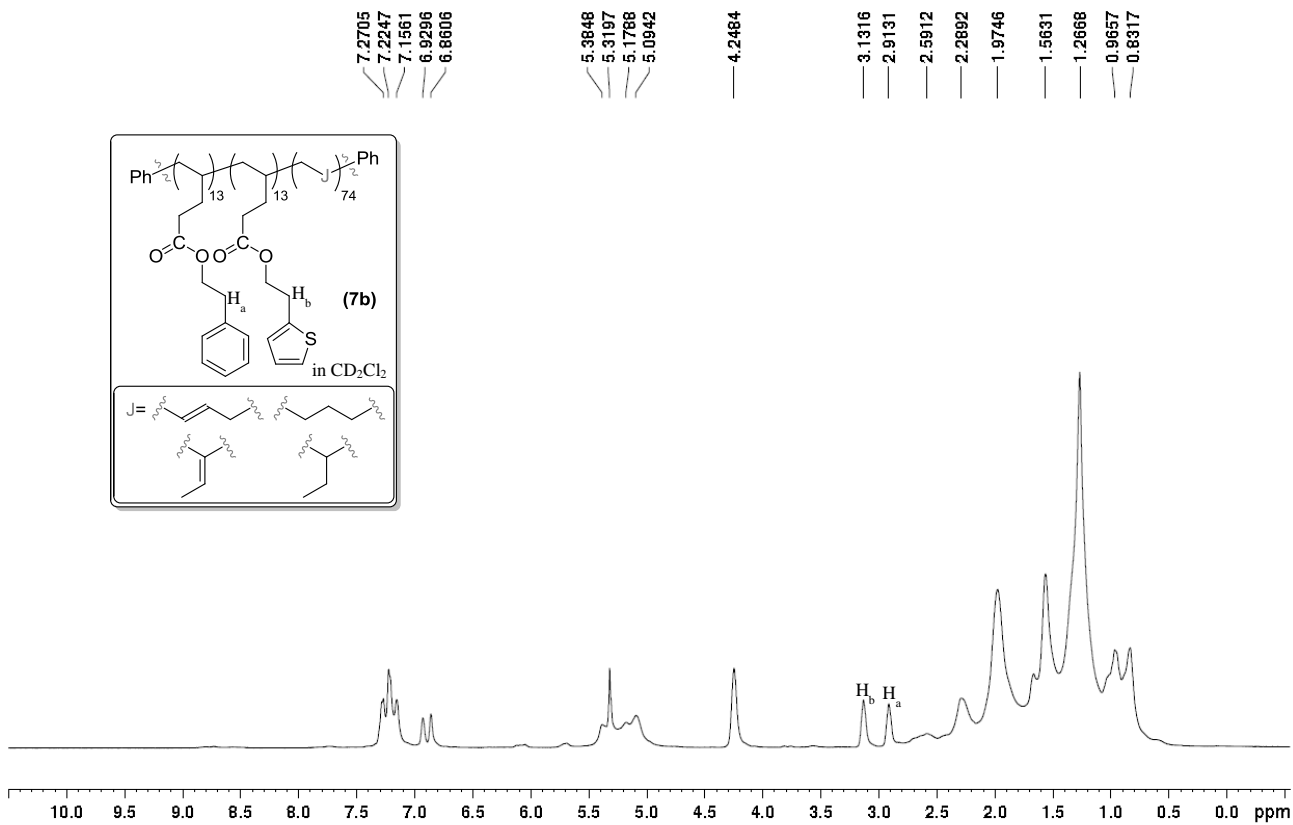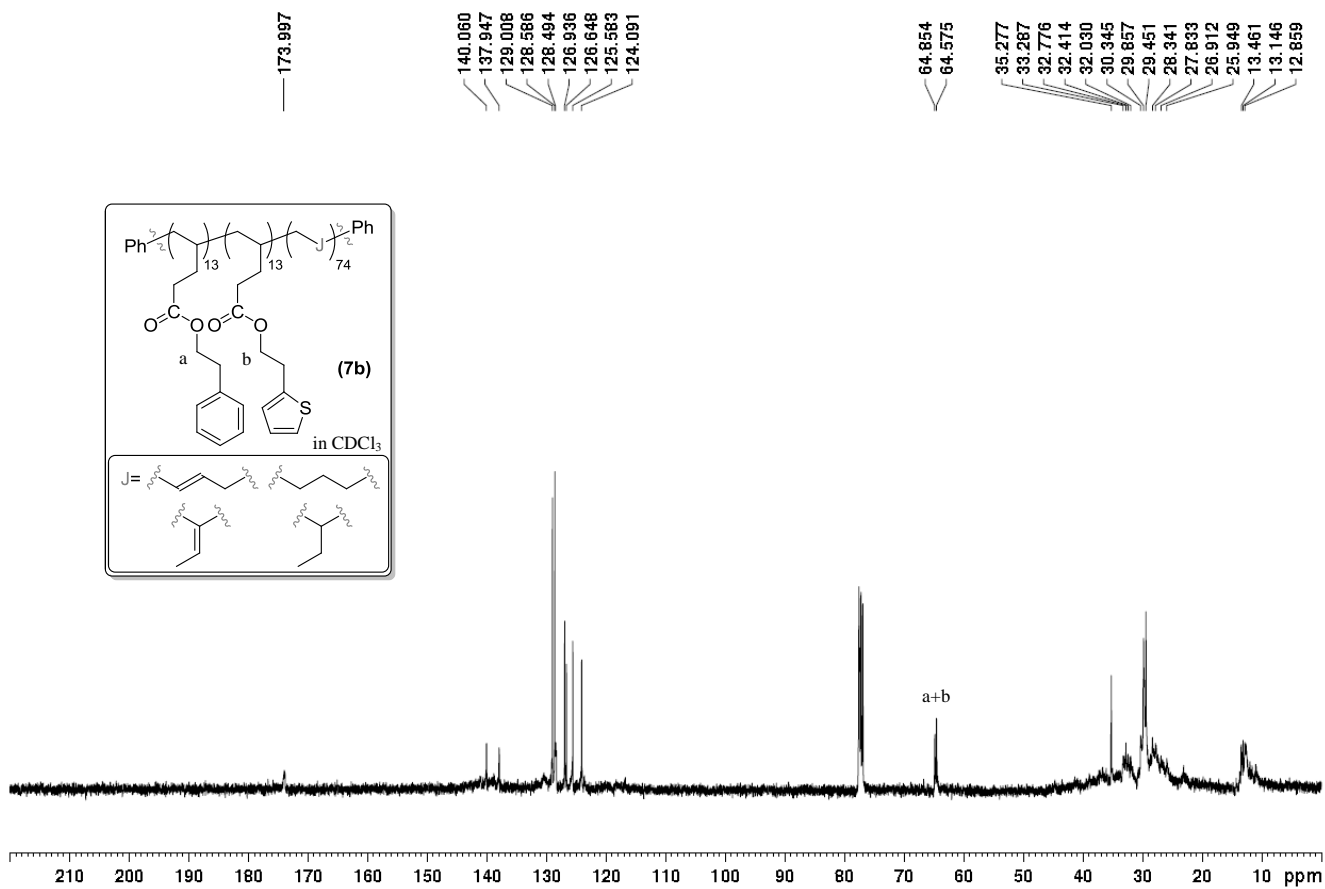



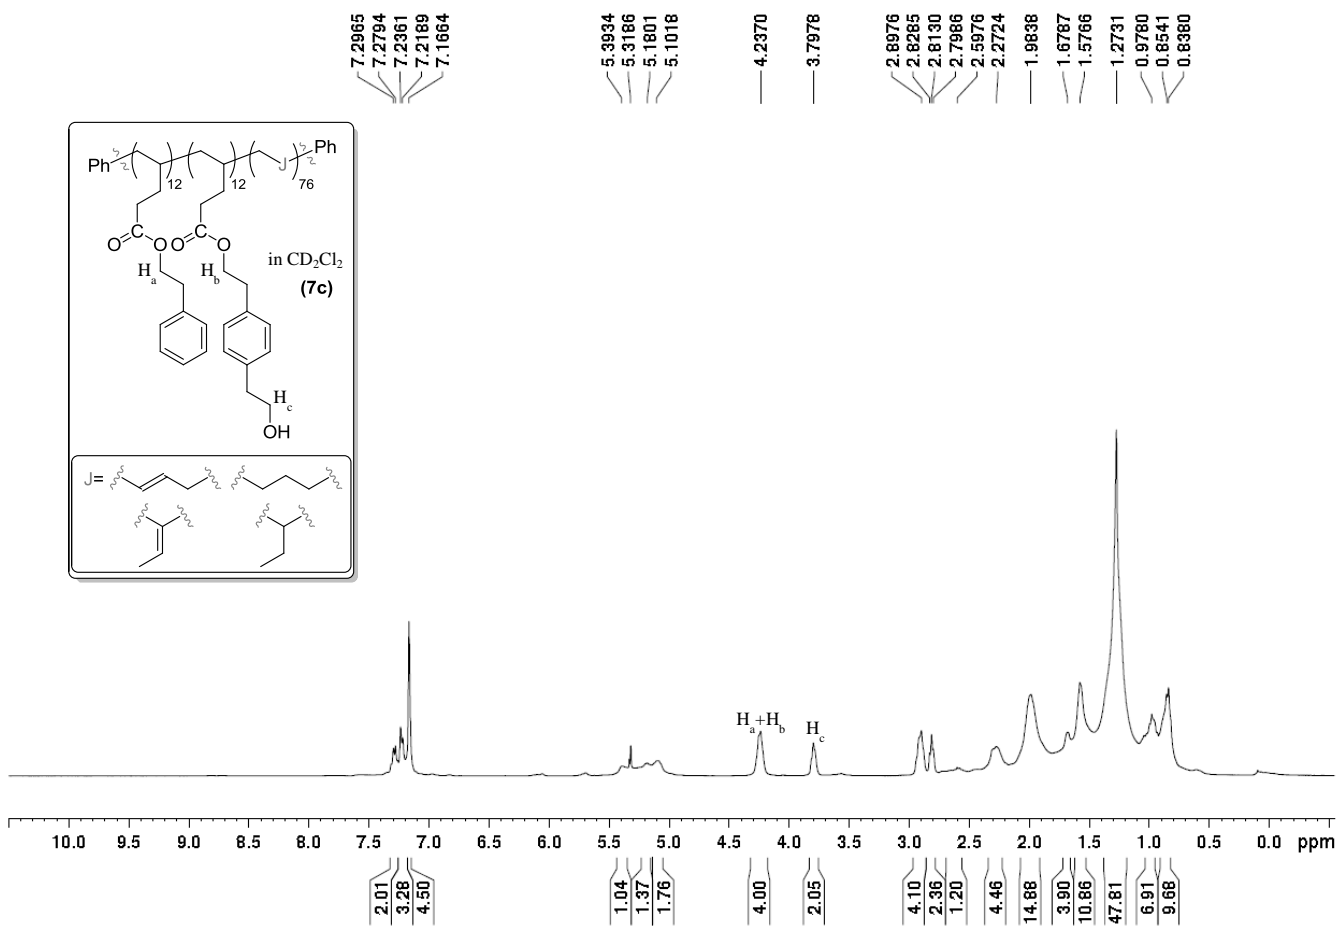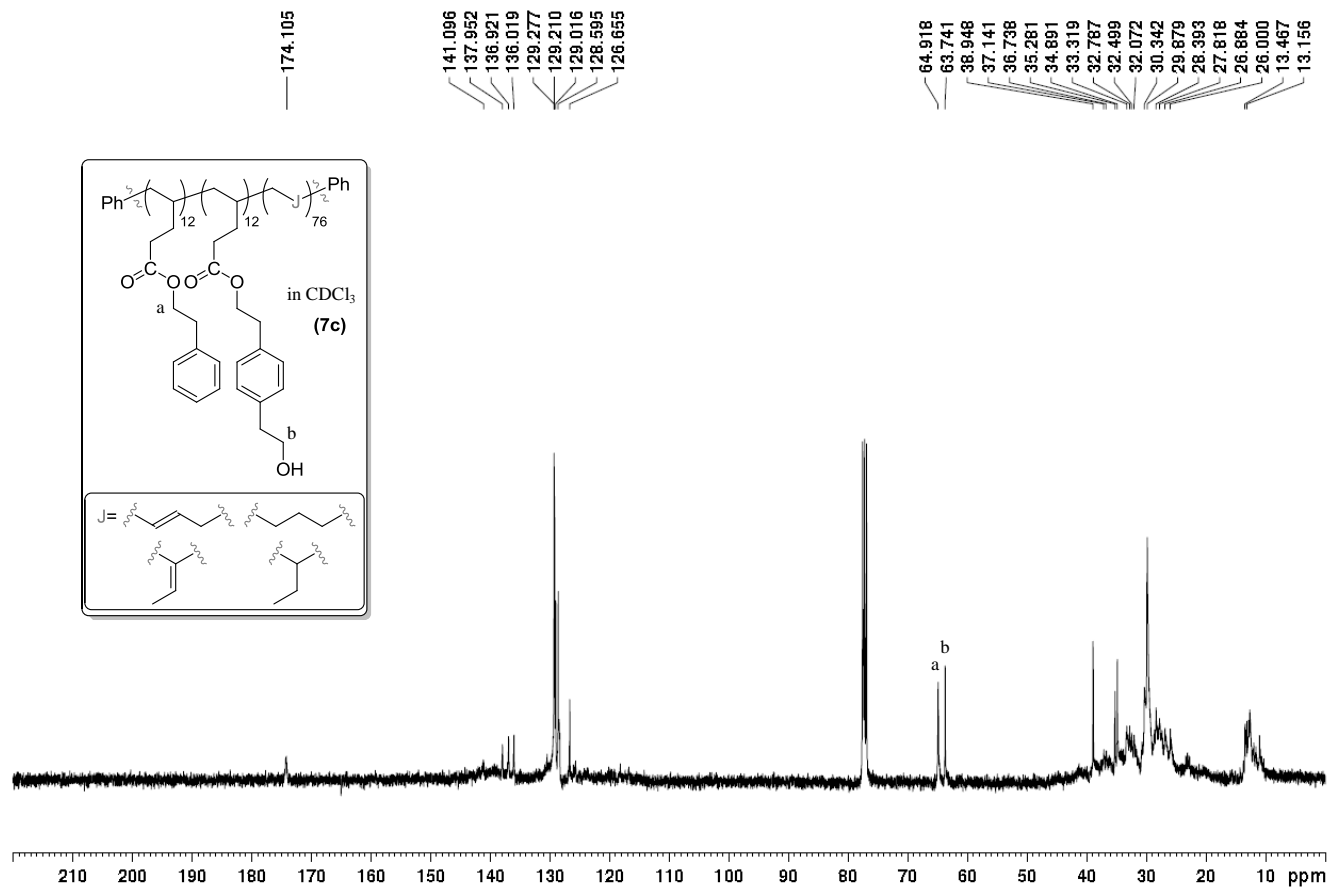

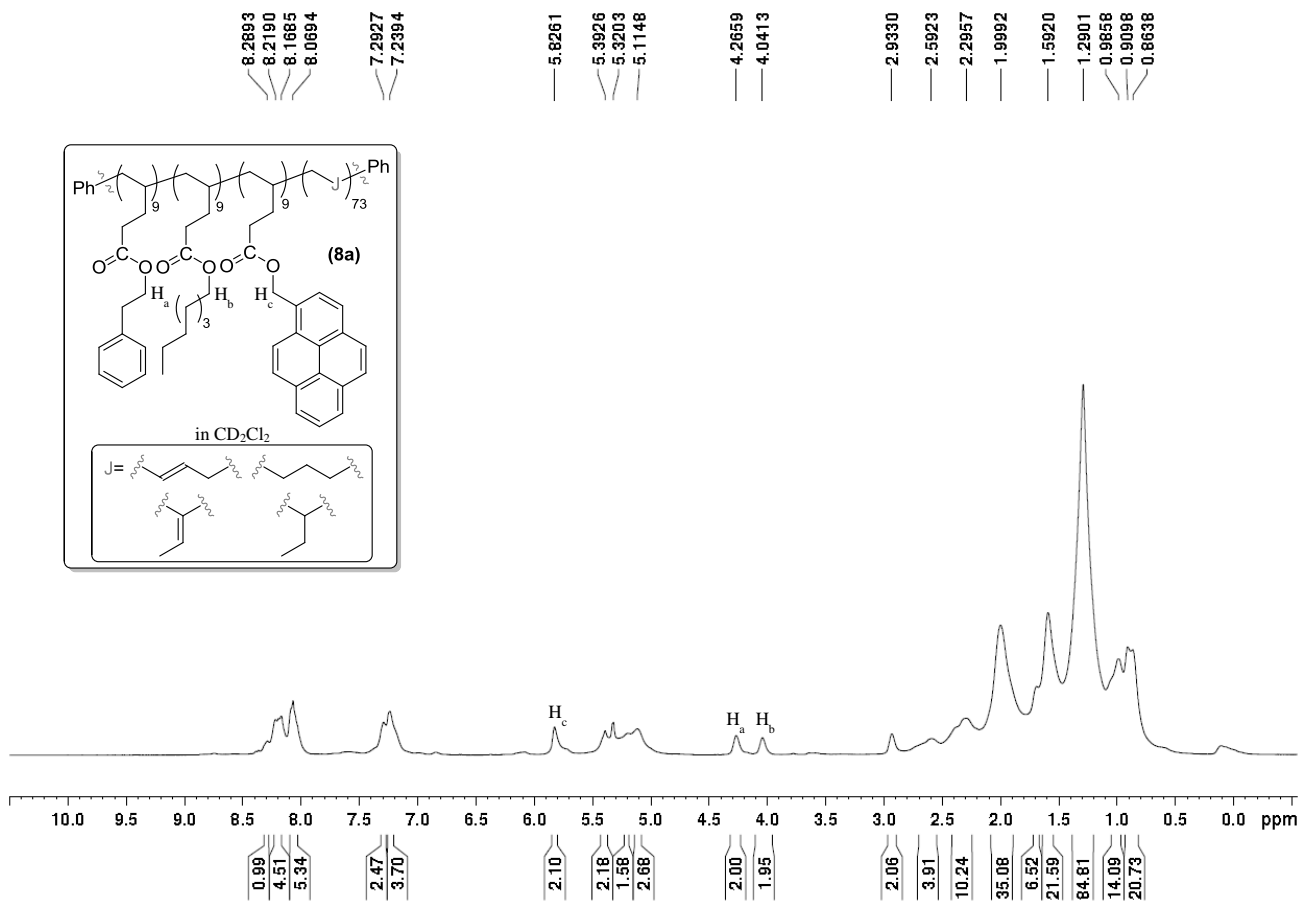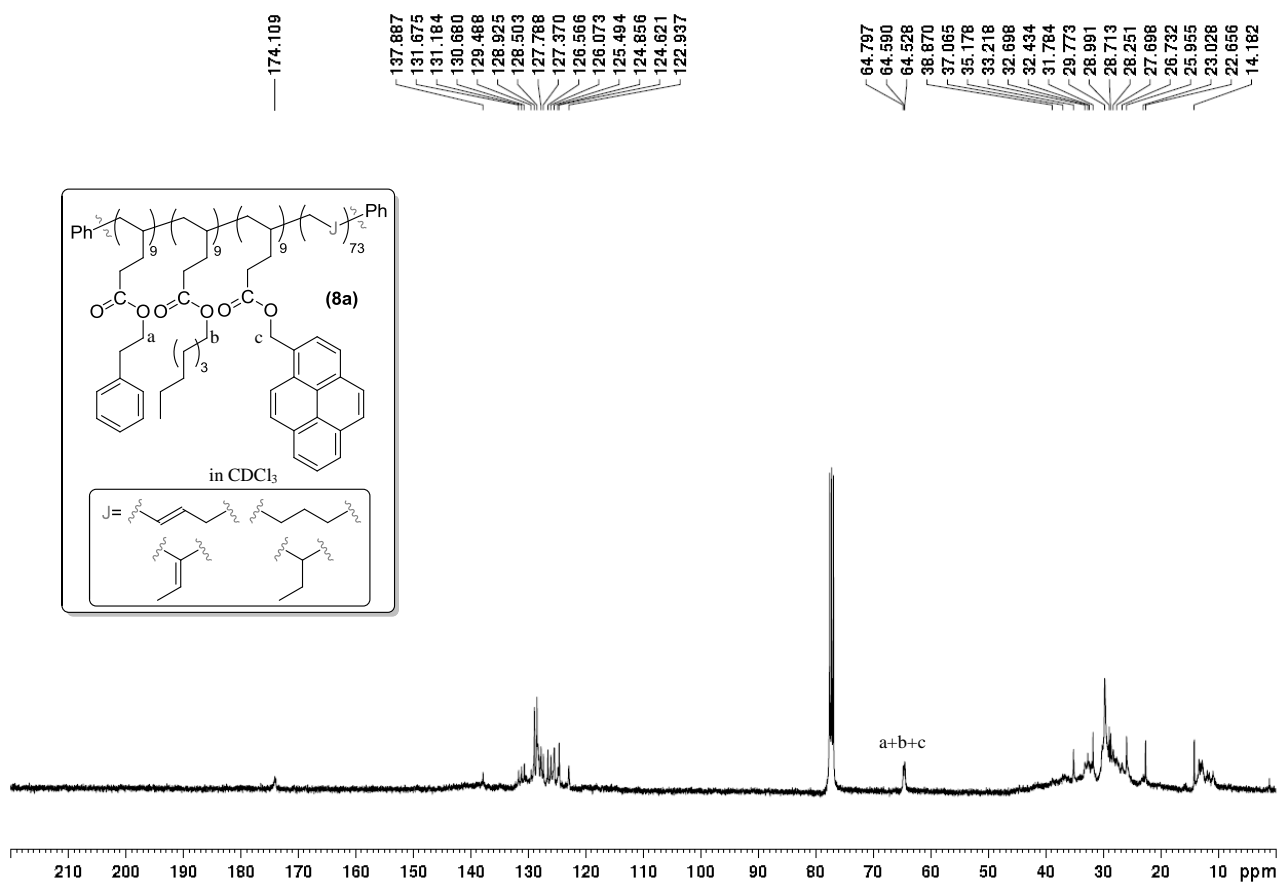

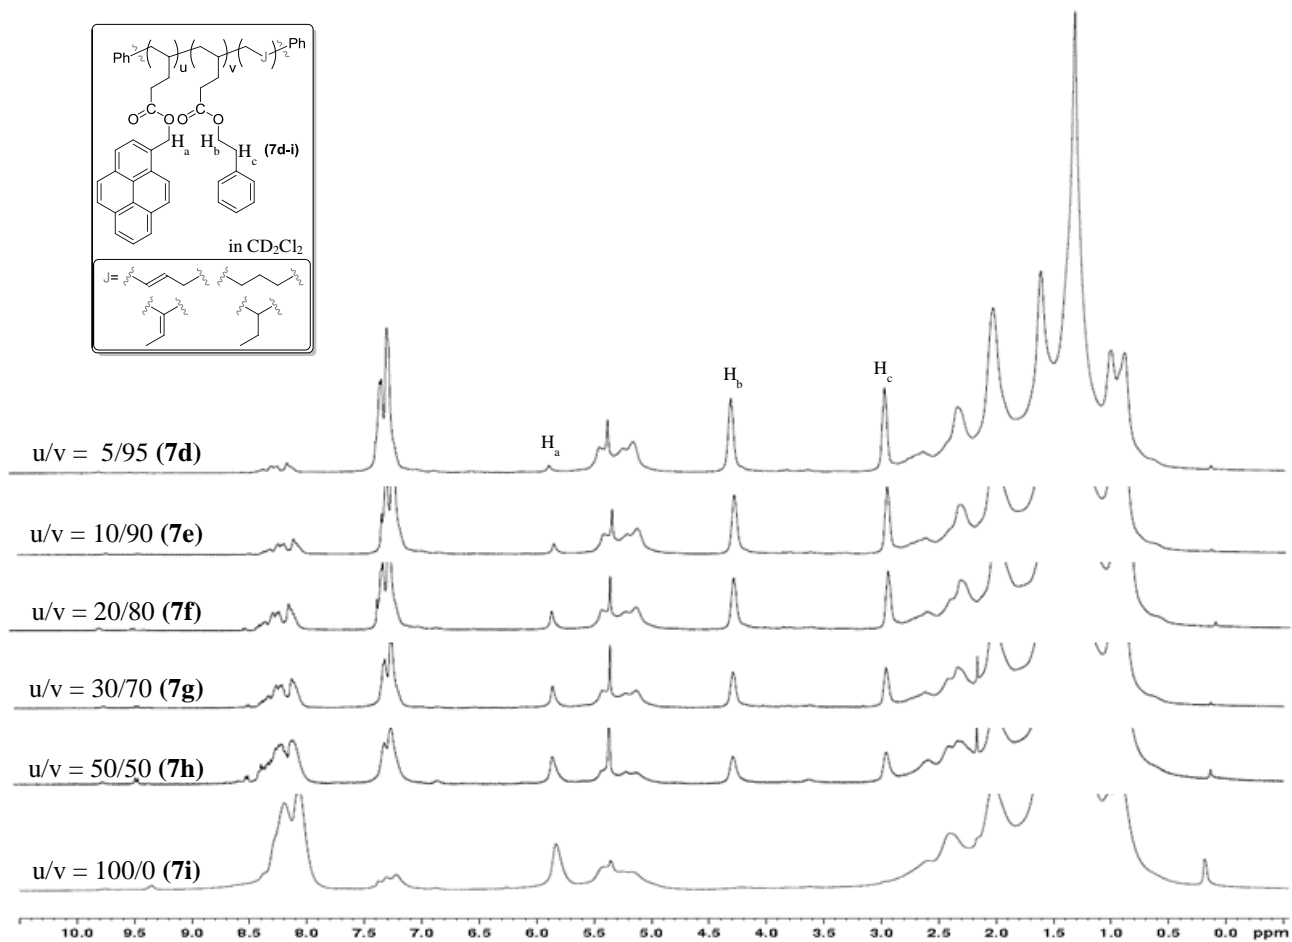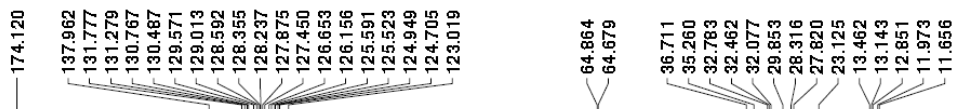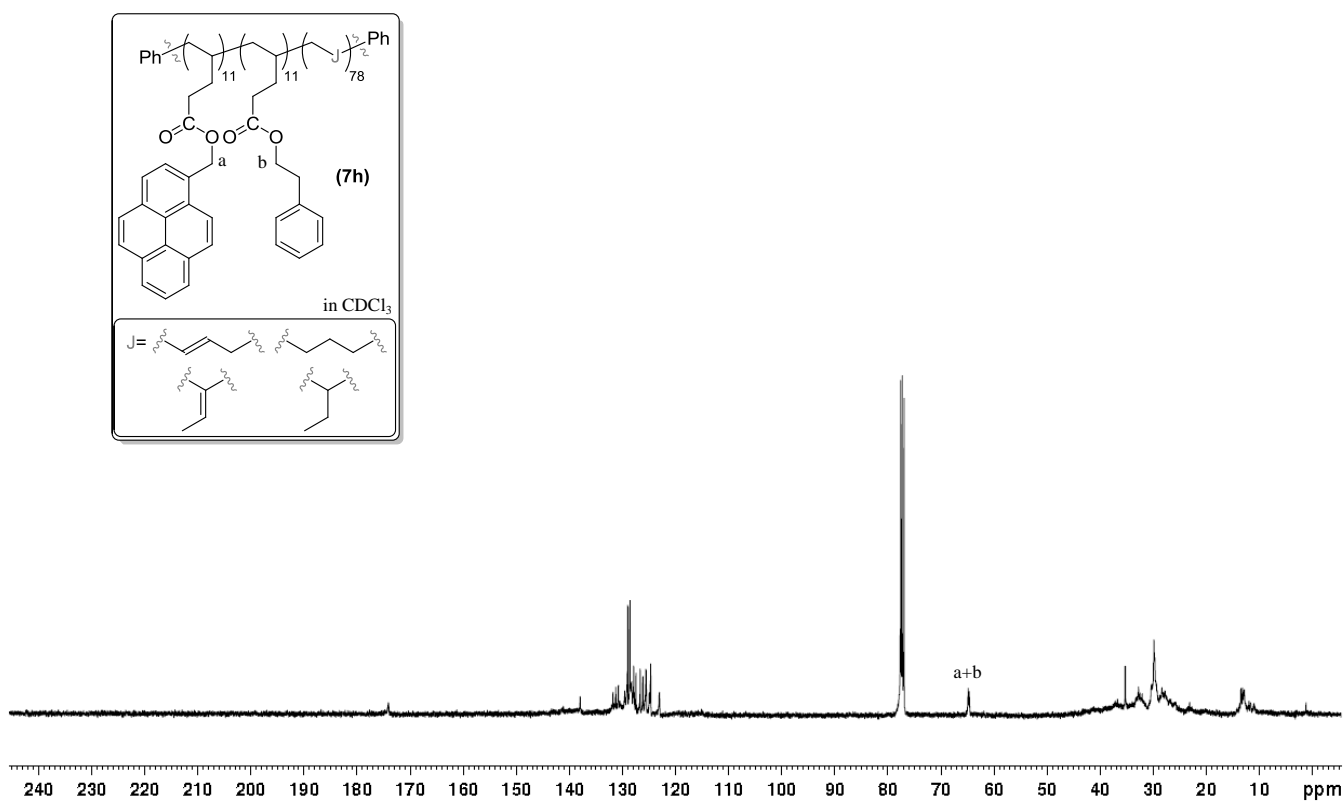

# IR SPECTRA

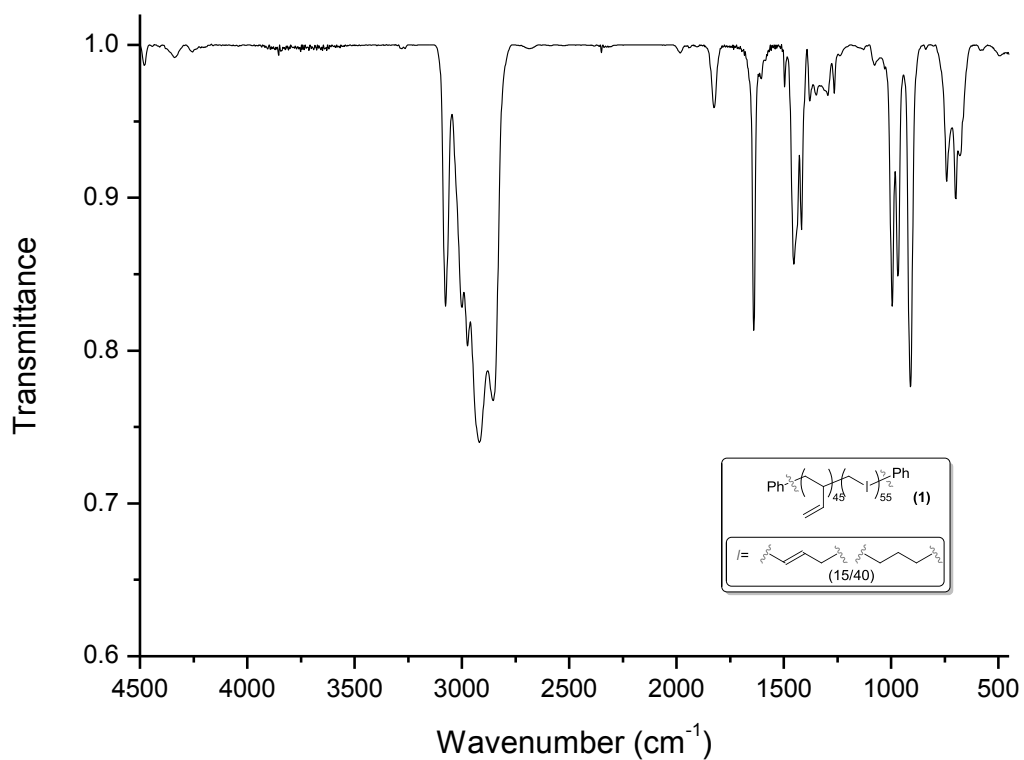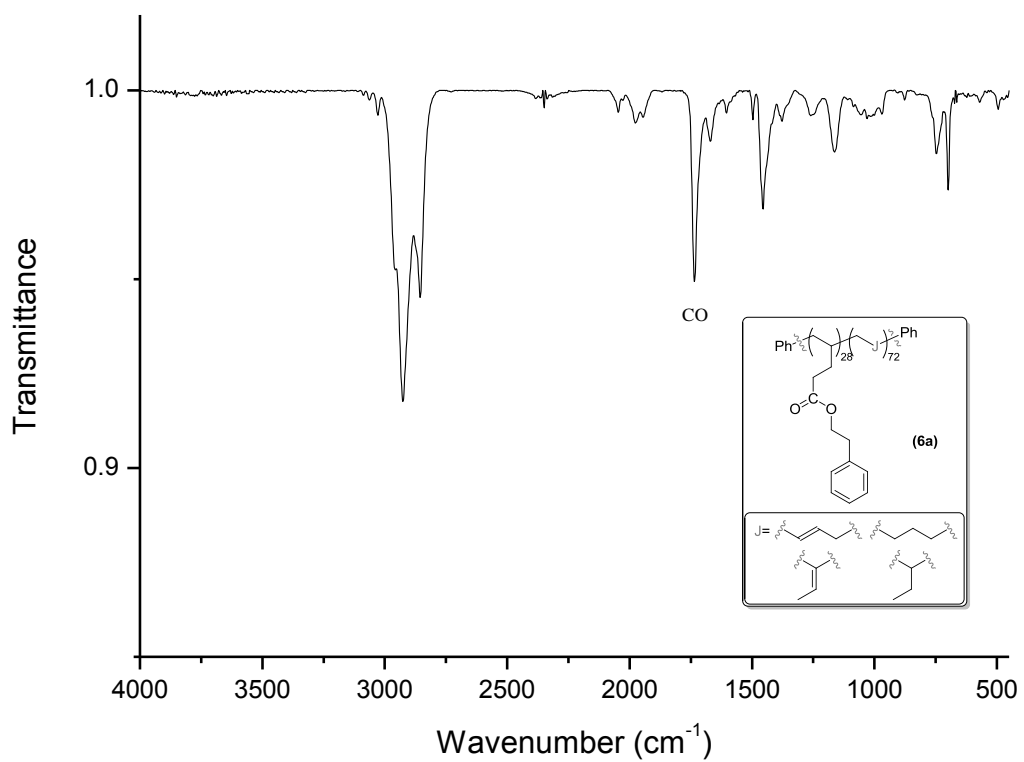

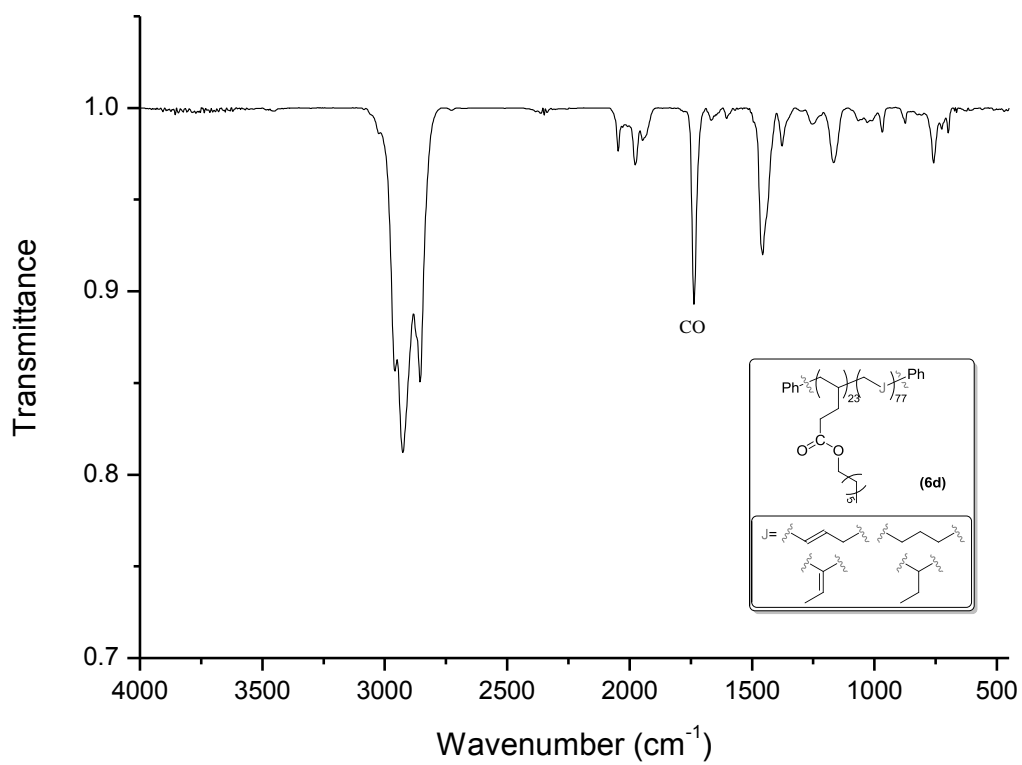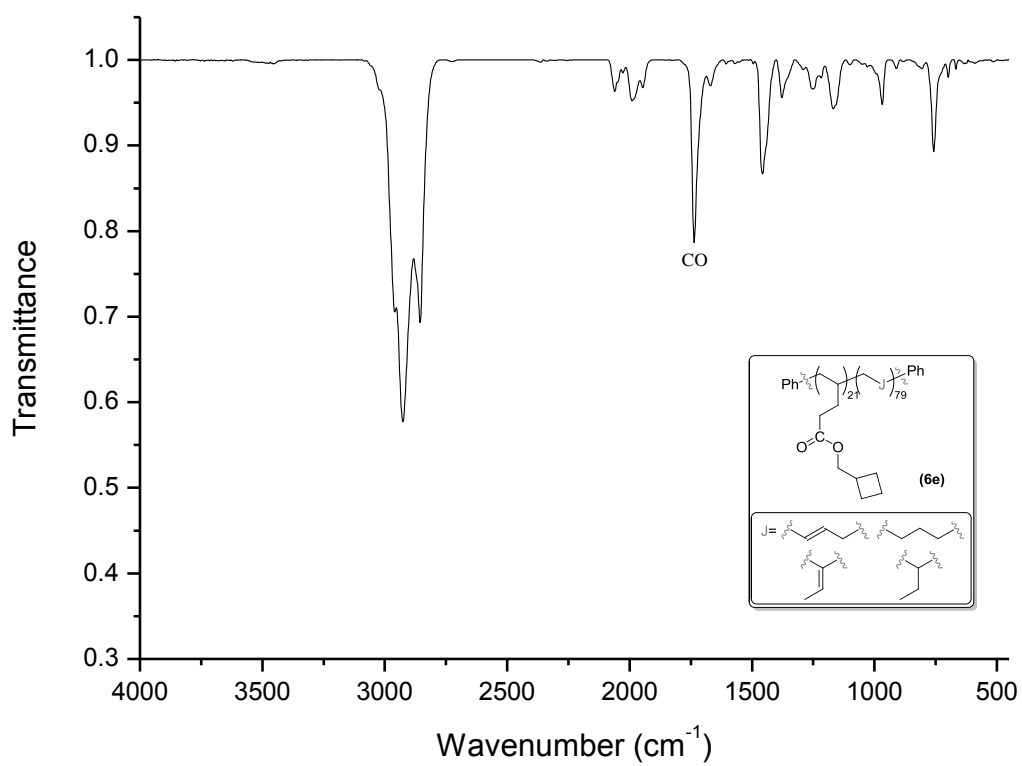

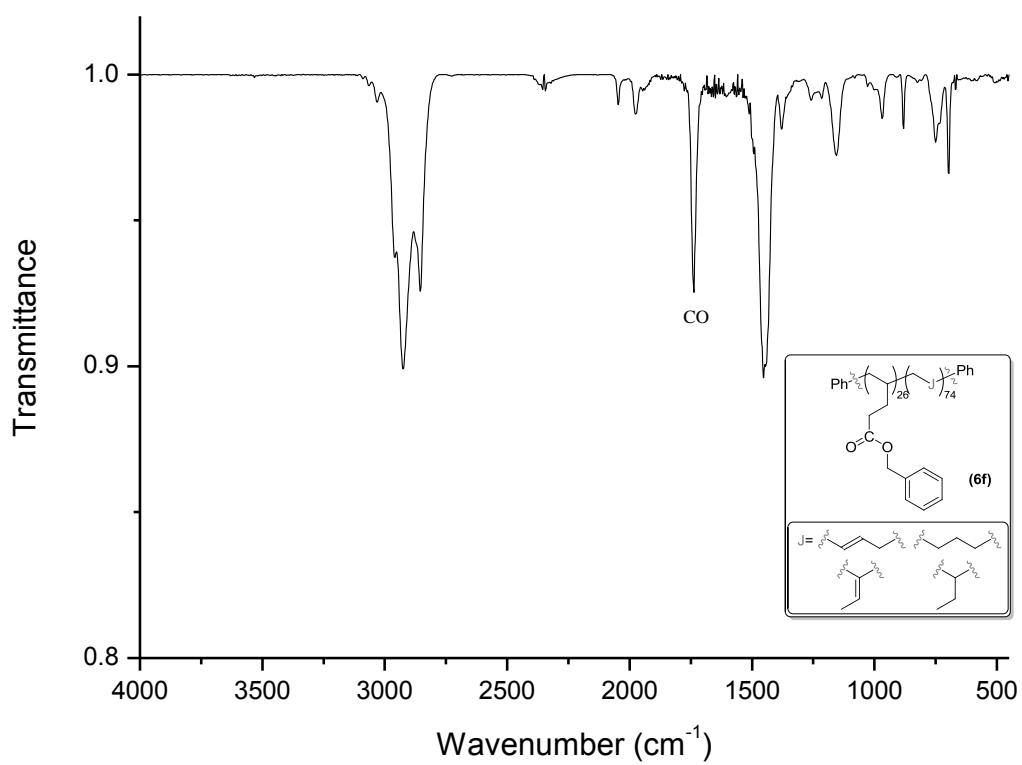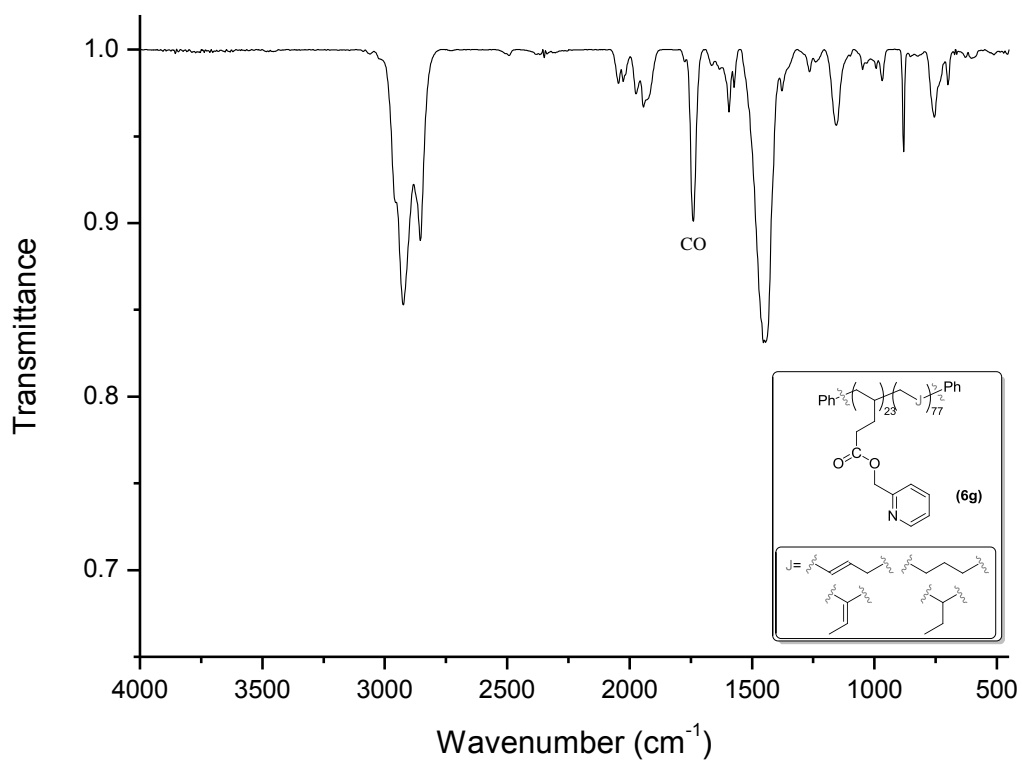

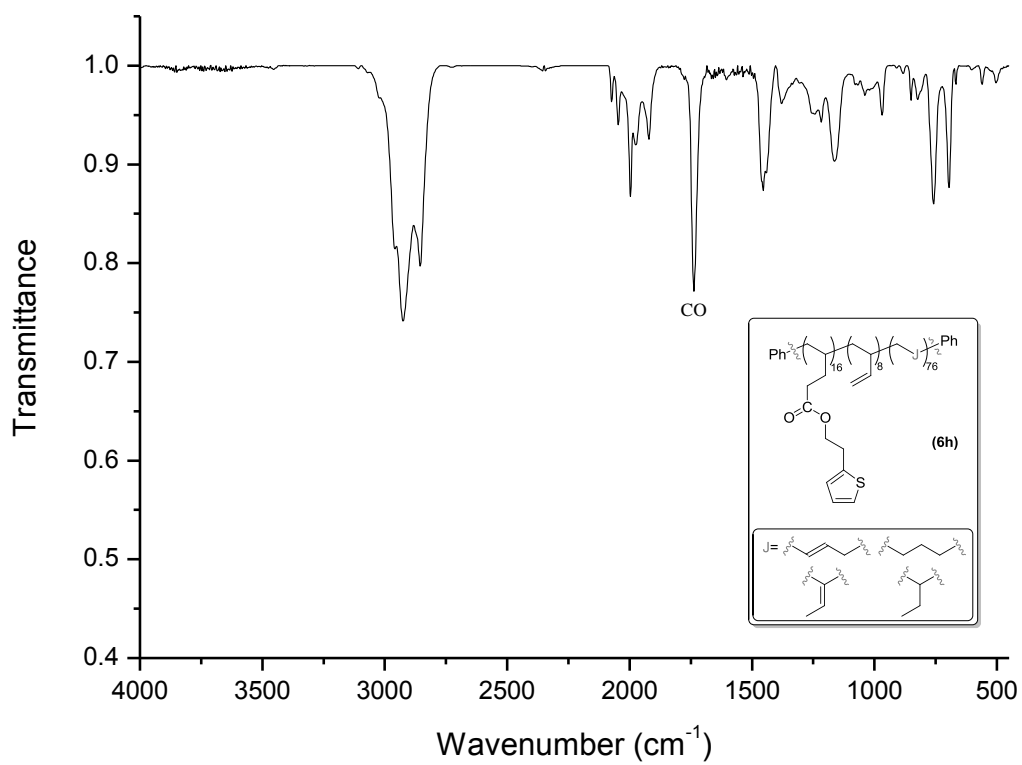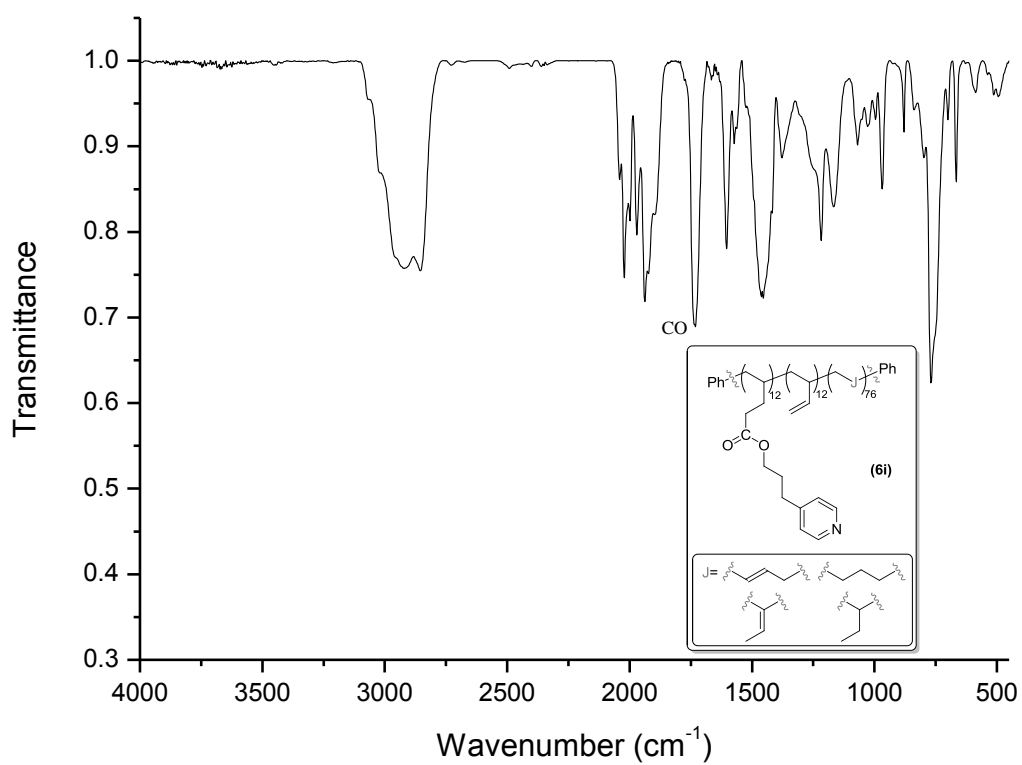

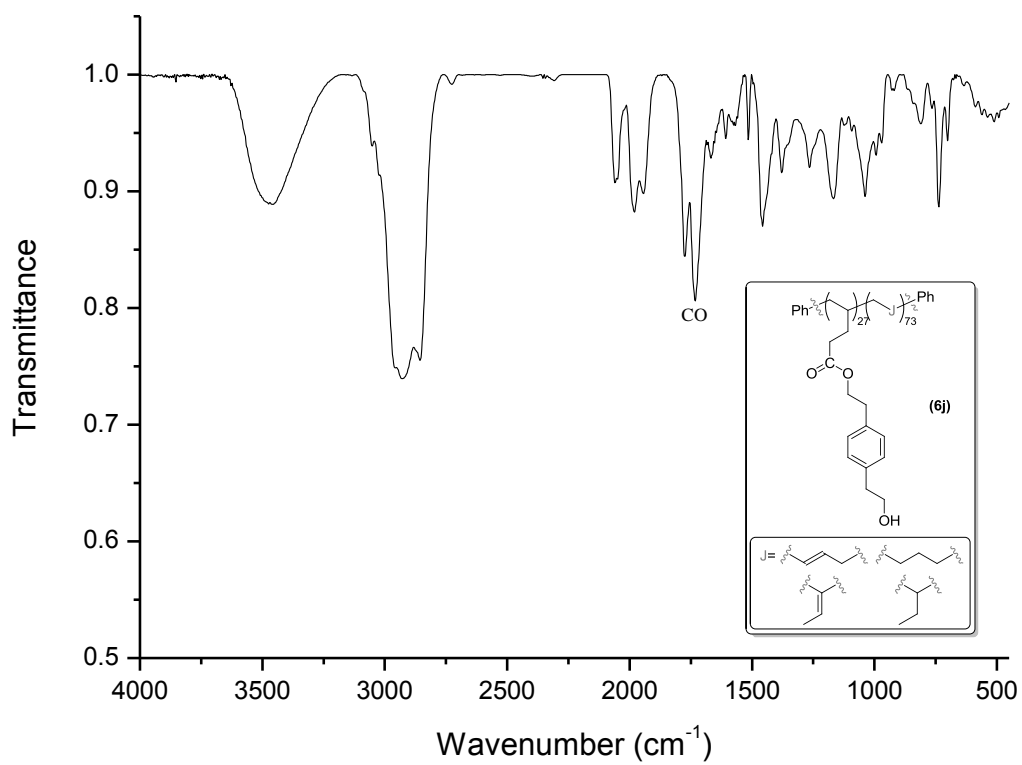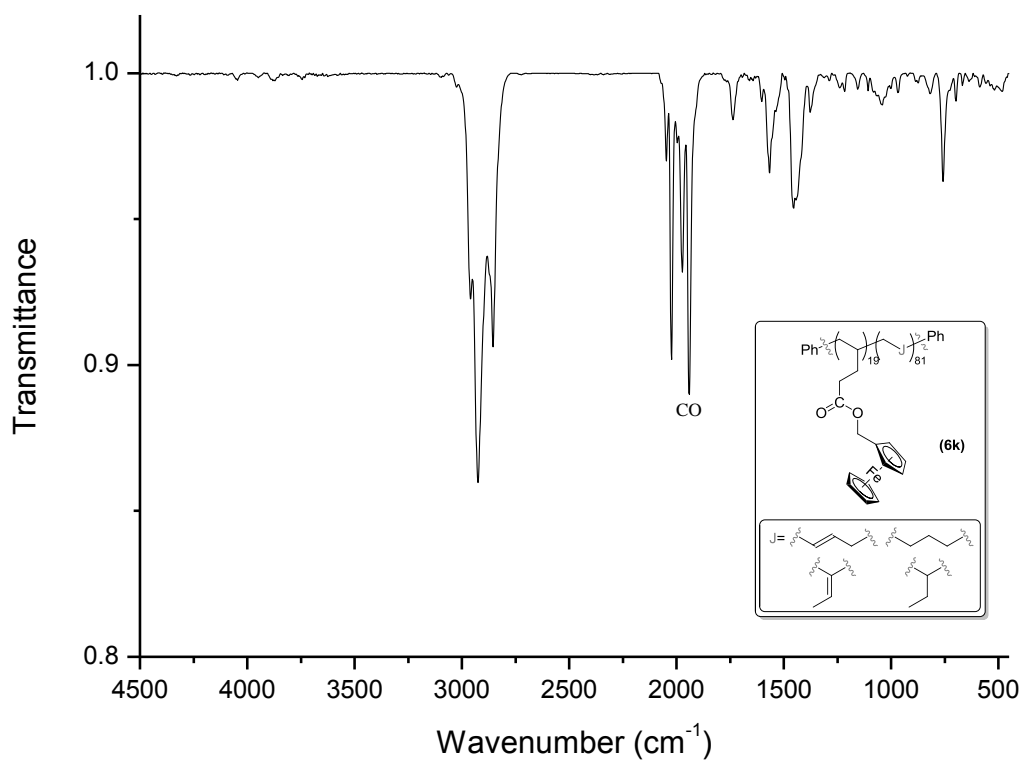



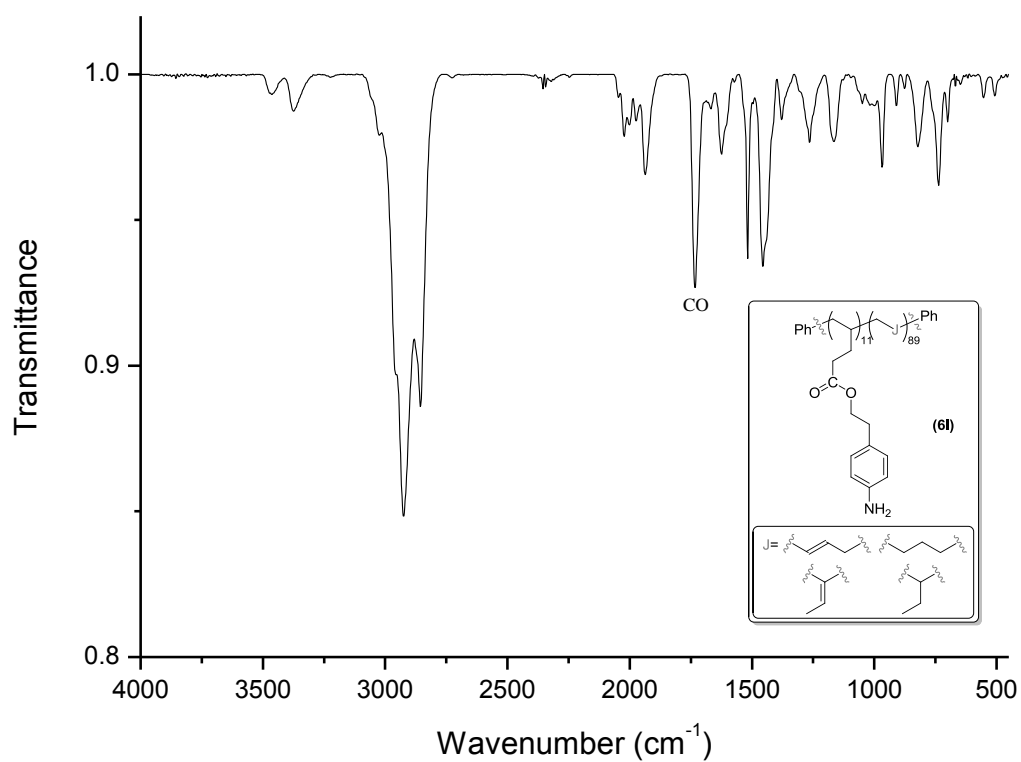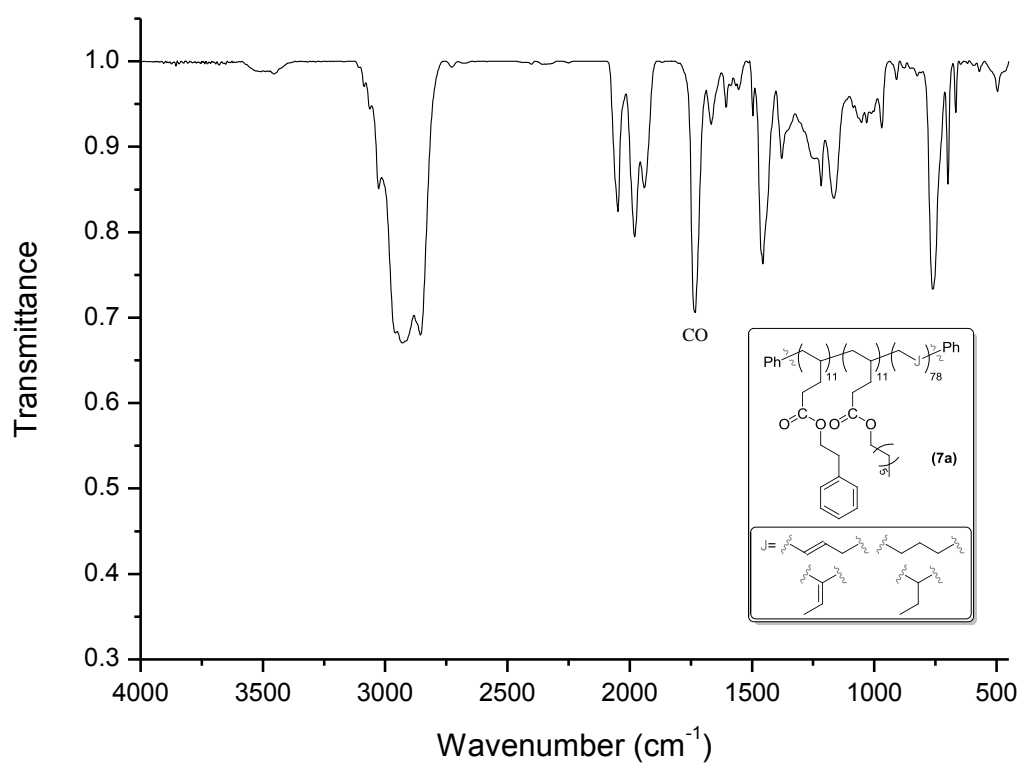

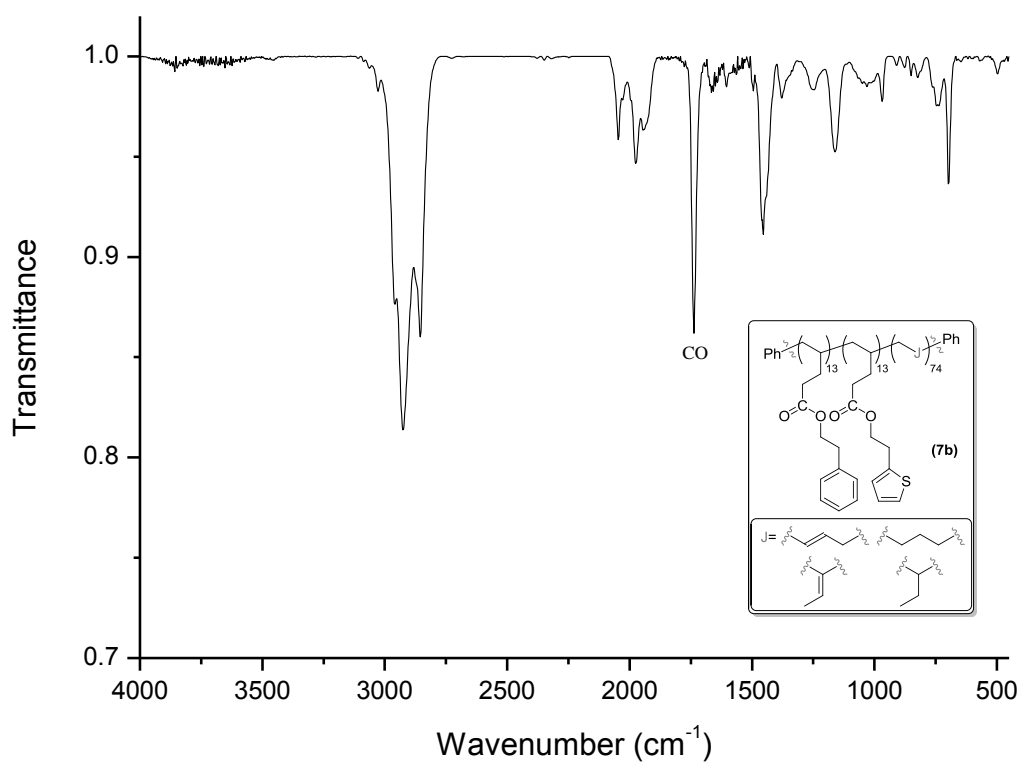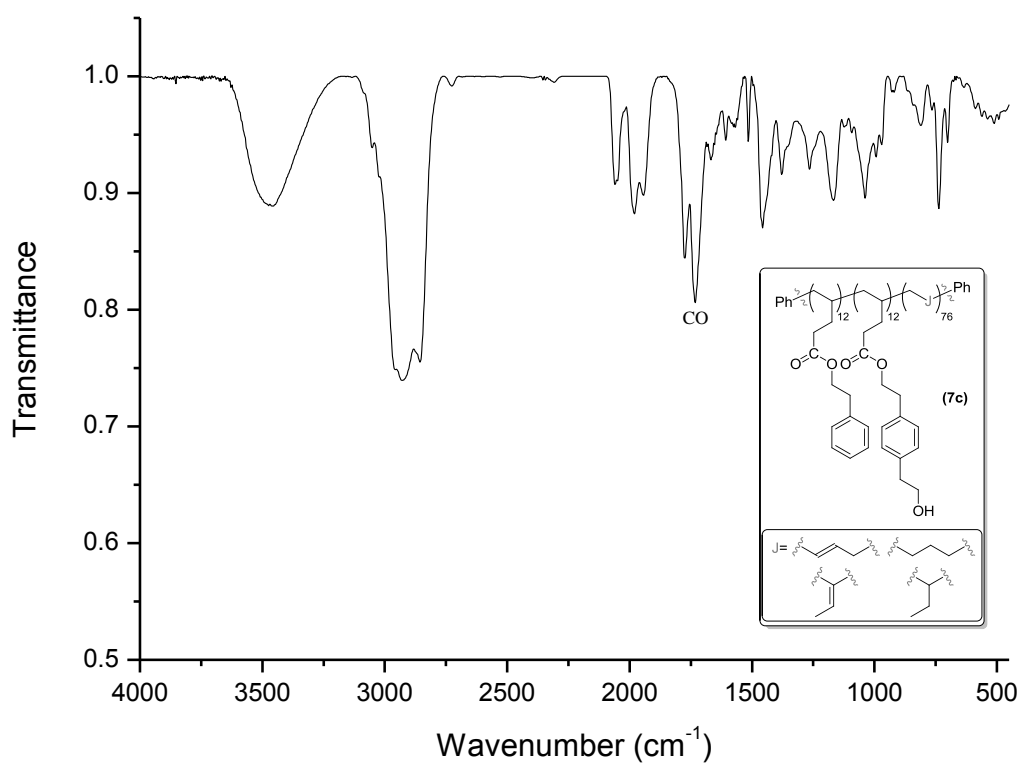

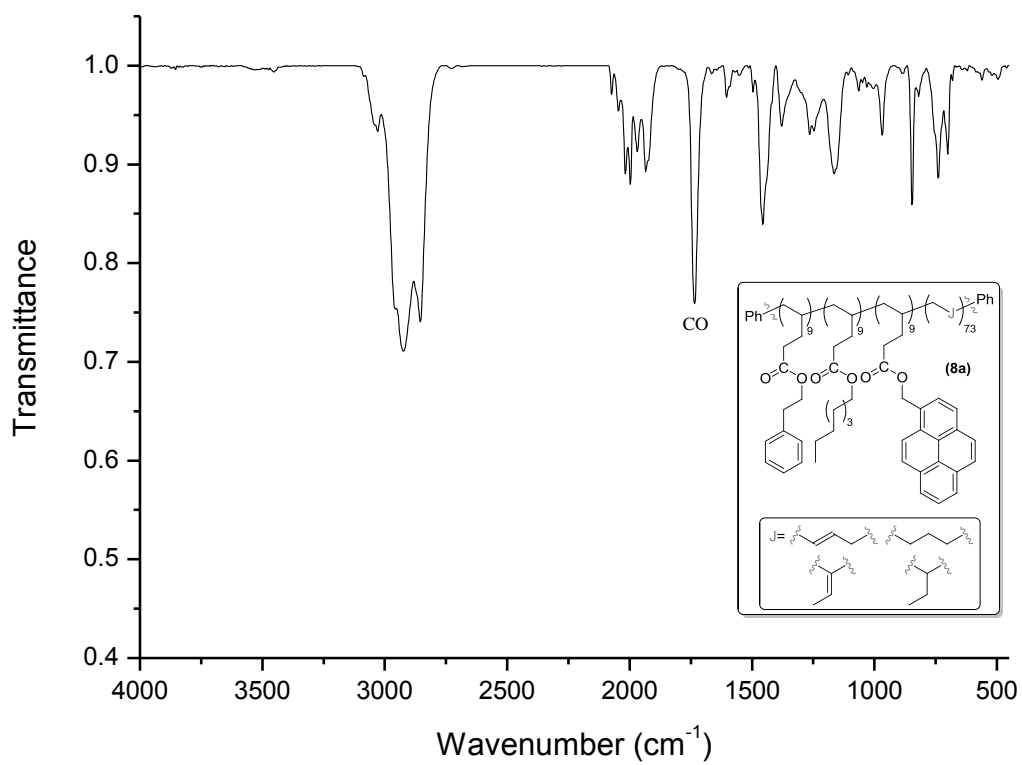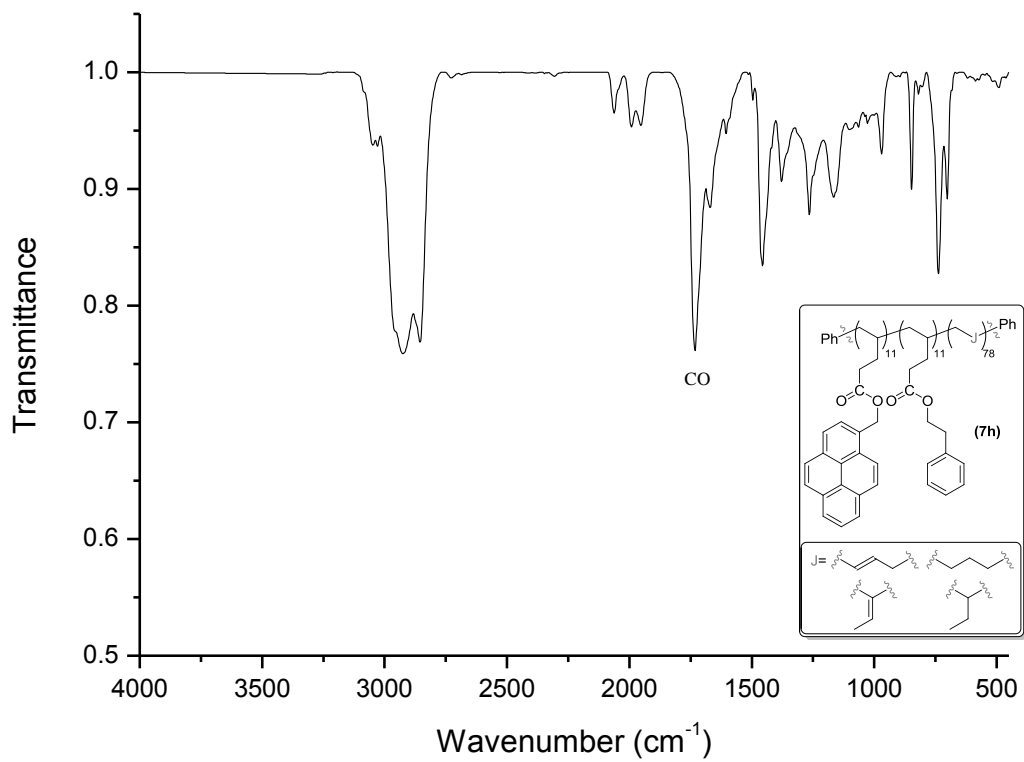

## TGA and DSC thermograms

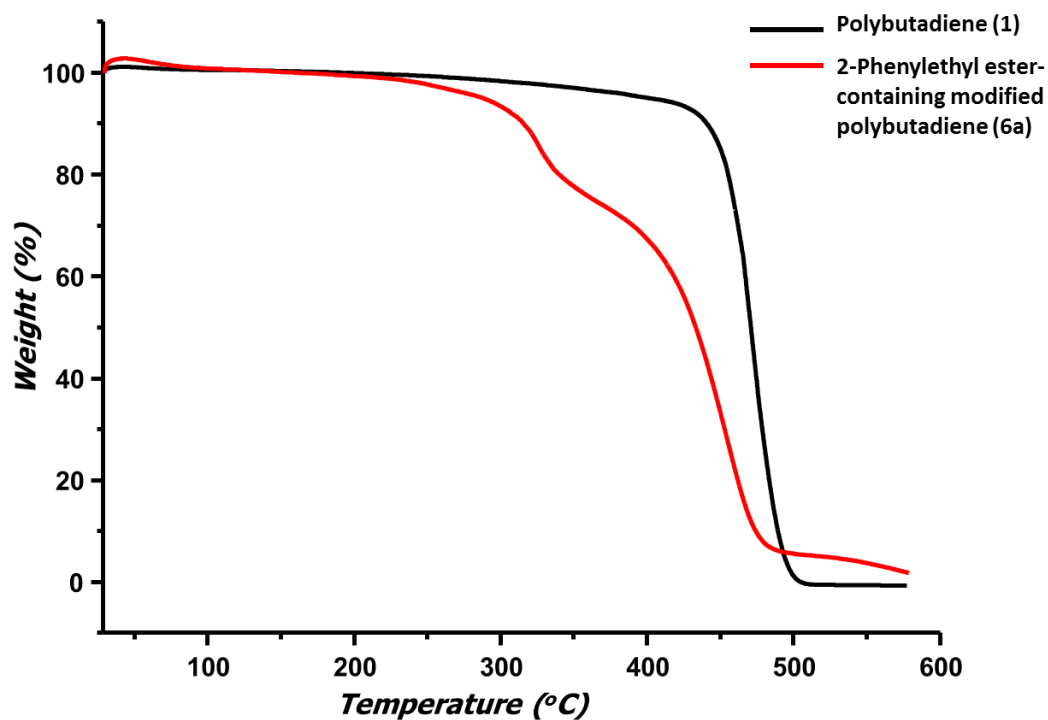

Fig S2. TGA plots of polybutadiene (1) and 2-phenylethyl ester-containing modified polybutadiene (6a)

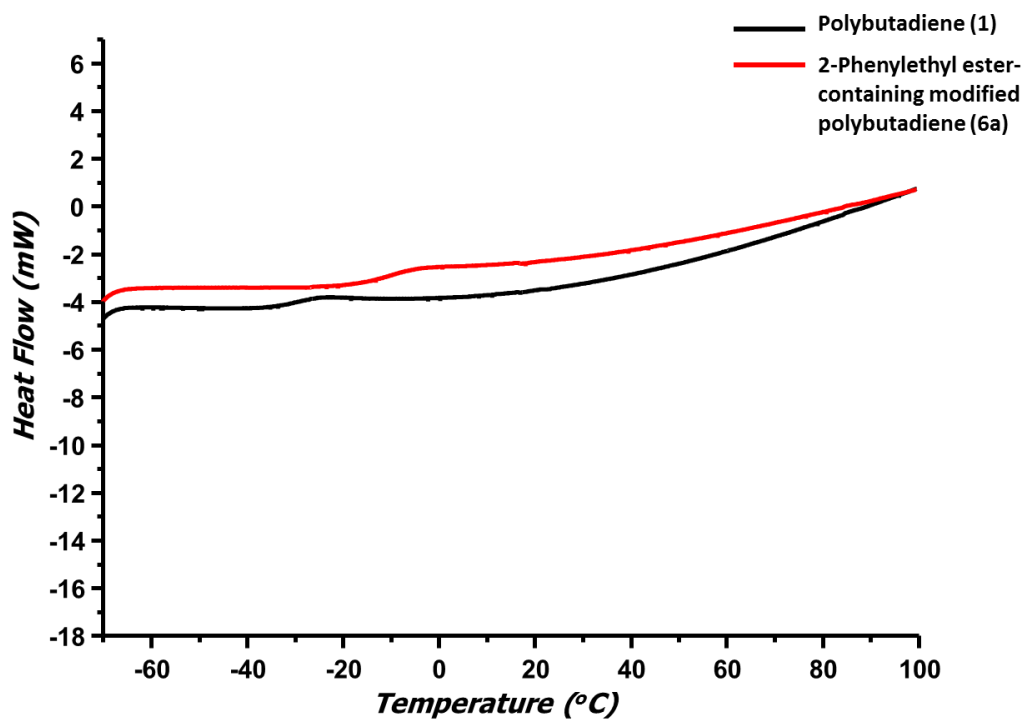

Fig S3. DSC trace of polybutadiene (1) and 2-phenylethyl ester-containing modified polybutadiene (6a)
